# Supplementary material
Source: PubMed Central journal article supplement (PMC4214524)
Supplement: ASN.2013090931_ASN2013090931SupplementaryData.pdf [file ASN.2013090931_ASN2013090931SupplementaryData.pdf]

## Supplemental figure legends

Suppl. Figure 1. Spreadsheet of microarray results for miR expression in control and aldosterone treated mCCD cells. The data represent intensity values from 10 independent arrays.

Suppl. Figure 2. CCD Cell isolation. Normalized, relative qRT-PCR quantitation of markers for different nephron cell types. RNA from isolated CCD cells as compared to whole kidney levels.  $\Delta$ CT values were normalized to actin and expressed as a fold difference in expression ( $\Delta\Delta$ CT). Target primers were against ENaC (DCT, CCD principal cell), V-ATPase (CCD intercalated cells), SGLT2 (S1 segment proximal tubule).

Suppl. Figure 3. miR Target prediction. A) Venn diagram comparison between 3 free-use miR target prediction algorithms (Targetscan, MiRanda and Pita) of predicted targets for miR-290-5p and mir-335-3p (all three sites did not have mmu-miR-1983 in their database so this miR was not included in the analysis). Overlapping target proteins for 2 or 3 of the algorithms is presented. B) ComiR target predictions were tested by RT-PCR for targets with a score  $>0.99$  by stimulating mCCD cells with 100nM aldosterone (24 hrs). Fold change in RNA expression was normalized to actin and quantitated for each target. SGK1 which was not predicted to be regulated by downregulated miRs (low ComiR score) was included as a positive controls as it is a known aldosterone-induced protein.

Suppl. Figure 1 (Array Data)

| cbl_ID                      | 10_0025 | 10_0026 | 10_0027 | 10_0028 | 10_0029 | 10_0030 | 10_0031 | 10_0032 | 10_0033 | 10_0034 |
|-----------------------------|---------|---------|---------|---------|---------|---------|---------|---------|---------|---------|
| ID                          | CTRL 1  | CTRL 2  | CTRL 3  | CTRL 4  | CTRL 5  | ALDO 1  | ALDO 2  | ALDO 3  | ALDO 4  | ALDO 5  |
| 5S_rRNA                     | 5209.24 | 6139.95 | 3749.25 | 4139.43 | 7433.09 | 7211.14 | 7863.34 | 7433.09 | 6302.06 | 6517.41 |
| bkv-miR-B1-3p/jcv-miR-J1-3p | 46.86   | 58.42   | 46.66   | 54.25   | 50.88   | 48.27   | 56.90   | 52.68   | 70.22   | 47.69   |
| bkv-miR-B1-5p               | 64.36   | 99.55   | 77.02   | 59.95   | 111.50  | 75.20   | 69.82   | 81.92   | 69.64   | 104.39  |
| ebv-miR-BART10              | 46.27   | 49.77   | 47.69   | 52.15   | 44.98   | 43.27   | 44.37   | 52.09   | 49.47   | 45.86   |
| ebv-miR-BART10*             | 101.26  | 102.46  | 115.21  | 110.84  | 138.73  | 124.39  | 141.32  | 129.23  | 125.33  | 108.55  |
| ebv-miR-BART11-3p           | 60.99   | 62.25   | 65.61   | 60.18   | 57.42   | 58.93   | 52.15   | 59.31   | 61.47   | 67.39   |
| ebv-miR-BART11-5p           | 102.39  | 93.07   | 106.73  | 85.91   | 132.23  | 94.50   | 93.66   | 106.93  | 107.56  | 100.02  |
| ebv-miR-BART12              | 79.00   | 82.75   | 89.05   | 88.73   | 105.80  | 93.27   | 84.07   | 85.25   | 86.44   | 79.39   |
| ebv-miR-BART13              | 351.39  | 339.32  | 464.52  | 374.97  | 340.50  | 269.18  | 297.86  | 289.41  | 294.93  | 1533.55 |
| ebv-miR-BART13*             | 89.52   | 63.27   | 71.01   | 73.02   | 77.57   | 70.50   | 70.32   | 65.61   | 78.02   | 69.42   |
| ebv-miR-BART1-3p            | 115.21  | 101.36  | 110.71  | 113.75  | 90.52   | 105.64  | 132.75  | 113.75  | 114.55  | 110.52  |
| ebv-miR-BART14              | 71.93   | 84.68   | 70.09   | 73.75   | 94.82   | 75.95   | 69.36   | 89.73   | 70.14   | 79.00   |
| ebv-miR-BART14*             | 150.24  | 125.75  | 137.07  | 101.71  | 241.75  | 113.46  | 129.59  | 134.08  | 118.12  | 129.43  |
| ebv-miR-BART15              | 81.62   | 78.81   | 80.08   | 90.52   | 75.32   | 92.27   | 79.93   | 83.70   | 87.52   | 72.85   |
| ebv-miR-BART1-5p            | 81.88   | 83.05   | 90.37   | 86.95   | 70.20   | 91.93   | 99.55   | 105.29  | 94.15   | 110.52  |
| ebv-miR-BART16              | 97.34   | 97.91   | 119.91  | 120.34  | 105.43  | 134.08  | 143.93  | 130.46  | 114.98  | 128.39  |
| ebv-miR-BART17-3p           | 97.61   | 123.98  | 113.83  | 109.98  | 107.19  | 122.30  | 145.55  | 116.05  | 118.05  | 101.89  |
| ebv-miR-BART17-5p           | 41.28   | 51.50   | 45.91   | 92.34   | 51.05   | 46.48   | 44.14   | 49.57   | 58.54   | 44.07   |
| ebv-miR-BART18-3p           | 63.91   | 70.66   | 68.39   | 69.67   | 77.98   | 73.86   | 59.39   | 63.93   | 63.06   | 68.20   |
| ebv-miR-BART18-5p           | 67.05   | 67.32   | 61.41   | 61.36   | 58.60   | 65.98   | 74.05   | 63.93   | 64.64   | 64.30   |
| ebv-miR-BART19-3p           | 649.52  | 510.45  | 2561.00 | 1029.14 | 1012.68 | 807.98  | 796.48  | 393.68  | 1058.10 | 1287.55 |
| ebv-miR-BART19-5p           | 156.68  | 134.55  | 139.77  | 152.41  | 113.98  | 165.77  | 162.39  | 146.07  | 136.55  | 121.68  |
| ebv-miR-BART20-3p           | 42.07   | 38.87   | 47.50   | 32.08   | 34.75   | 33.09   | 48.98   | 36.95   | 35.29   | 52.64   |
| ebv-miR-BART20-5p           | 52.15   | 50.69   | 57.26   | 51.68   | 47.69   | 46.48   | 49.60   | 56.73   | 51.63   | 52.64   |
| ebv-miR-BART21-3p           | 87.38   | 73.07   | 71.50   | 75.14   | 64.36   | 74.48   | 85.30   | 69.14   | 79.66   | 69.42   |
| ebv-miR-BART21-5p           | 36.04   | 30.23   | 33.39   | 41.80   | 53.70   | 36.52   | 31.77   | 30.60   | 35.73   | 34.93   |
| ebv-miR-BART22              | 37.50   | 116.73  | 38.70   | 35.22   | 48.77   | 37.69   | 37.69   | 34.75   | 37.08   | 48.93   |
| ebv-miR-BART2-3p            | 67.89   | 56.73   | 111.50  | 105.43  | 55.02   | 50.69   | 58.98   | 62.73   | 58.86   | 99.27   |
| ebv-miR-BART2-5p            | 99.95   | 90.77   | 90.37   | 79.57   | 91.30   | 85.70   | 104.23  | 88.73   | 92.53   | 88.43   |
| ebv-miR-BART3               | 123.37  | 116.73  | 99.27   | 63.93   | 71.30   | 81.80   | 122.77  | 90.68   | 73.70   | 105.71  |
| ebv-miR-BART3*              | 96.05   | 79.84   | 89.50   | 94.50   | 80.55   | 86.95   | 92.27   | 89.19   | 102.16  | 81.36   |
| ebv-miR-BART4               | 82.82   | 76.39   | 63.61   | 67.67   | 81.98   | 80.39   | 66.86   | 68.48   | 69.08   | 58.98   |
| ebv-miR-BART4*              | 74.55   | 81.88   | 78.14   | 51.68   | 70.68   | 62.69   | 70.77   | 93.07   | 65.95   | 84.90   |
| ebv-miR-BART5               | 76.58   | 85.93   | 93.66   | 73.02   | 85.30   | 79.26   | 74.64   | 78.52   | 79.36   | 85.48   |
| ebv-miR-BART5*              | 79.39   | 116.21  | 71.98   | 120.57  | 93.89   | 62.69   | 66.86   | 66.91   | 80.06   | 62.11   |
| ebv-miR-BART6-3p            | 148.11  | 126.68  | 281.75  | 182.16  | 153.00  | 179.00  | 151.80  | 145.82  | 176.11  | 204.23  |
| ebv-miR-BART6-5p            | 96.18   | 92.14   | 96.59   | 97.34   | 71.86   | 103.41  | 105.43  | 91.30   | 91.70   | 86.84   |
| ebv-miR-BART7               | 71.93   | 86.45   | 73.14   | 68.39   | 66.16   | 74.14   | 67.83   | 68.75   | 73.39   | 63.32   |
| ebv-miR-BART7*              | 95.80   | 96.32   | 96.98   | 83.50   | 190.61  | 105.64  | 115.52  | 105.55  | 89.63   | 106.73  |
| ebv-miR-BART8               | 52.15   | 58.64   | 58.60   | 60.18   | 53.52   | 59.99   | 68.87   | 59.31   | 58.77   | 49.57   |

|                                       |          |          |          |          |          |          |          |          |          |          |
|---------------------------------------|----------|----------|----------|----------|----------|----------|----------|----------|----------|----------|
| ebv-miR-BART8*                        | 228.39   | 236.71   | 309.66   | 295.16   | 241.75   | 260.66   | 267.21   | 210.80   | 259.38   | 322.21   |
| ebv-miR-BART9                         | 90.98    | 88.05    | 88.70    | 89.50    | 89.84    | 95.48    | 96.89    | 92.82    | 86.88    | 85.70    |
| ebv-miR-BART9*                        | 83.80    | 82.11    | 100.23   | 87.77    | 106.05   | 92.52    | 99.95    | 97.07    | 88.76    | 98.41    |
| ebv-miR-BHRF1-1                       | 120.64   | 137.07   | 160.23   | 184.30   | 128.86   | 153.00   | 156.68   | 166.11   | 173.69   | 181.71   |
| ebv-miR-BHRF1-2                       | 77.82    | 90.37    | 76.07    | 87.43    | 74.36    | 70.86    | 68.16    | 85.48    | 80.41    | 73.86    |
| ebv-miR-BHRF1-2*                      | 67.67    | 57.00    | 56.48    | 56.75    | 52.75    | 50.69    | 61.68    | 47.69    | 52.71    | 51.32    |
| ebv-miR-BHRF1-3                       | 95.32    | 106.82   | 98.00    | 78.59    | 98.73    | 73.14    | 90.89    | 101.98   | 83.63    | 99.80    |
| hcmv-miR-UL112                        | 76.32    | 70.82    | 79.39    | 68.02    | 71.57    | 67.73    | 70.32    | 65.61    | 68.07    | 71.98    |
| hcmv-miR-UL148D                       | 385.84   | 401.07   | 374.97   | 296.91   | 387.91   | 452.03   | 408.55   | 352.66   | 366.78   | 368.68   |
| hcmv-miR-UL22A                        | 80.02    | 73.75    | 76.32    | 76.48    | 66.91    | 80.05    | 79.93    | 87.77    | 83.22    | 73.11    |
| hcmv-miR-UL22A*                       | 64.02    | 62.69    | 70.68    | 74.30    | 53.94    | 63.20    | 62.92    | 70.68    | 74.14    | 64.76    |
| hcmv-miR-UL36                         | 79.64    | 65.02    | 68.08    | 67.39    | 77.43    | 67.00    | 63.93    | 75.32    | 66.49    | 92.45    |
| hcmv-miR-UL36*                        | 99.48    | 90.64    | 103.99   | 79.57    | 100.91   | 93.27    | 104.23   | 83.36    | 87.60    | 102.39   |
| hcmv-miR-UL70-3p                      | 86.55    | 87.41    | 72.48    | 72.11    | 67.41    | 63.20    | 72.34    | 78.93    | 77.53    | 76.73    |
| hcmv-miR-UL70-5p                      | 48.93    | 60.18    | 53.57    | 55.90    | 88.73    | 55.93    | 58.60    | 64.70    | 62.76    | 50.59    |
| hcmv-miR-US25-1                       | 100.59   | 91.89    | 77.57    | 80.41    | 95.32    | 88.98    | 84.73    | 94.73    | 90.69    | 84.24    |
| hcmv-miR-US25-1*                      | 66.77    | 51.05    | 58.75    | 52.68    | 66.66    | 62.69    | 46.23    | 51.75    | 56.48    | 63.32    |
| hcmv-miR-US25-2-3p                    | 53.18    | 49.55    | 43.00    | 44.07    | 39.64    | 46.23    | 75.14    | 45.73    | 44.84    | 50.88    |
| hcmv-miR-US25-2-5p                    | 40.70    | 36.04    | 30.23    | 39.11    | 31.77    | 40.34    | 36.43    | 37.90    | 37.58    | 43.55    |
| hcmv-miR-US33-3p                      | 60.99    | 59.29    | 54.47    | 44.37    | 51.48    | 50.30    | 58.60    | 54.17    | 49.46    | 59.59    |
| hcmv-miR-US33-5p                      | 112.18   | 110.23   | 114.66   | 101.36   | 89.27    | 102.66   | 110.23   | 87.23    | 100.56   | 93.66    |
| hcmv-miR-US4                          | 44.07    | 46.66    | 44.14    | 42.82    | 59.84    | 99.48    | 47.16    | 53.84    | 47.13    | 38.70    |
| hcmv-miR-US5-1                        | 76.41    | 67.81    | 71.01    | 63.61    | 64.23    | 65.02    | 71.50    | 69.42    | 68.42    | 65.76    |
| hcmv-miR-US5-2                        | 120.86   | 80.24    | 85.42    | 76.84    | 235.91   | 81.18    | 73.36    | 58.64    | 75.84    | 90.37    |
| hiv1-miR-H1                           | 87.38    | 61.77    | 75.64    | 75.14    | 61.32    | 69.50    | 70.32    | 60.41    | 79.45    | 74.14    |
| hiv1-miR-N367                         | 149.71   | 151.55   | 120.34   | 109.64   | 114.50   | 122.77   | 112.46   | 121.68   | 117.36   | 107.11   |
| hiv1-miR-TAR-3p                       | 108.55   | 101.89   | 129.02   | 84.24    | 113.16   | 90.98    | 105.98   | 100.86   | 82.43    | 118.33   |
| hiv1-miR-TAR-5p                       | 75.80    | 60.39    | 58.07    | 58.30    | 55.93    | 69.73    | 73.36    | 58.95    | 65.48    | 52.64    |
| hsa-let-7a*/mmu-let-7a*/mnu-let-7c-2* | 119.91   | 141.32   | 152.77   | 192.77   | 123.05   | 192.77   | 163.39   | 229.48   | 192.17   | 142.82   |
| hsa-let-7a/mmu-let-7a/rno-let-7a      | 16996.80 | 19679.00 | 19679.00 | 19679.00 | 21159.30 | 21159.30 | 24397.10 | 22097.60 | 20419.15 | 19679.00 |
| hsa-let-7b*/mmu-let-7b*/rno-let-7b*   | 281.05   | 251.77   | 217.89   | 279.27   | 287.11   | 261.98   | 261.98   | 260.66   | 279.30   | 220.05   |
| hsa-let-7b/mmu-let-7b/rno-let-7b      | 49553.70 | 44210.70 | 44210.70 | 44210.70 | 42426.20 | 39259.30 | 39259.30 | 33481.70 | 41735.00 | 44210.70 |
| hsa-let-7c/mmu-let-7c/rno-let-7c      | 6349.55  | 6648.32  | 8809.30  | 8066.27  | 8809.30  | 8809.30  | 8066.27  | 10161.20 | 7964.81  | 7863.34  |
| hsa-let-7d*/mmu-let-7d*/rno-let-7d*   | 506.27   | 387.91   | 249.27   | 395.82   | 225.73   | 291.43   | 349.59   | 278.25   | 353.48   | 355.93   |
| hsa-let-7d/mmu-let-7d/rno-let-7d      | 6037.30  | 5008.57  | 6139.95  | 6139.95  | 6139.95  | 6037.30  | 5583.82  | 7863.34  | 6200.62  | 4730.59  |
| hsa-let-7e/mmu-let-7e/rno-let-7e      | 7038.25  | 8066.27  | 4588.39  | 6201.14  | 6517.41  | 6139.95  | 6349.55  | 5392.98  | 5779.40  | 6648.32  |
| hsa-let-7f/mmu-let-7f/rno-let-7f      | 1149.77  | 1637.61  | 1787.11  | 1823.75  | 2126.86  | 2415.61  | 2025.80  | 3135.41  | 2152.57  | 1372.16  |
| hsa-let-7f-1*/mmu-let-7f*             | 155.48   | 145.82   | 159.46   | 204.23   | 90.89    | 163.05   | 148.66   | 171.68   | 165.82   | 152.41   |
| hsa-let-7g*/mmu-let-7g*               | 67.05    | 66.79    | 71.86    | 84.24    | 67.41    | 80.39    | 83.66    | 86.16    | 77.98    | 70.66    |
| hsa-let-7g/mmu-let-7g                 | 15282.20 | 13196.00 | 13196.00 | 15282.20 | 13807.10 | 13807.10 | 11197.80 | 13807.10 | 14226.00 | 10161.20 |
| hsa-let-7i*/mmu-let-7i*/rno-let-7i*   | 132.75   | 149.00   | 113.83   | 156.68   | 123.82   | 161.91   | 169.20   | 171.11   | 162.93   | 150.24   |
| hsa-let-7i/mmu-let-7i/rno-let-7i      | 13196.00 | 16996.80 | 15282.20 | 14644.90 | 19679.00 | 15282.20 | 14644.90 | 16996.80 | 14544.65 | 14644.90 |
| hsa-miR-1/mmu-miR-1                   | 51.50    | 52.25    | 50.98    | 108.21   | 46.17    | 56.62    | 58.98    | 56.48    | 64.22    | 50.05    |

|                                                 |          |          |          |          |          |          |          |          |          |          |
|-------------------------------------------------|----------|----------|----------|----------|----------|----------|----------|----------|----------|----------|
| hsa-miR-100/mmu-miR-100/rno-miR-100             | 66.48    | 76.05    | 68.95    | 65.70    | 92.59    | 67.73    | 78.10    | 93.59    | 70.90    | 87.21    |
| hsa-miR-101*/mmu-miR-101a*/rno-miR-101a*        | 70.45    | 66.79    | 65.39    | 71.25    | 63.09    | 68.77    | 61.98    | 66.20    | 71.63    | 63.64    |
| hsa-miR-101/mmu-miR-101a/rno-miR-101a           | 1499.59  | 1477.89  | 1101.27  | 1236.68  | 1236.68  | 1477.89  | 1372.16  | 1637.61  | 1341.16  | 1391.73  |
| hsa-miR-103/mmu-miR-103/rno-miR-103             | 1533.55  | 1455.73  | 1477.89  | 1787.11  | 1477.89  | 1787.11  | 1533.55  | 1937.00  | 1624.84  | 1236.68  |
| hsa-miR-106b*/mmu-miR-106b*/rno-miR-106b*       | 186.30   | 201.09   | 176.46   | 224.48   | 482.84   | 177.32   | 215.86   | 207.71   | 191.17   | 172.11   |
| hsa-miR-106b/mmu-miR-106b/rno-miR-106b          | 4862.45  | 5209.24  | 3561.01  | 4588.39  | 4730.59  | 3749.25  | 4139.43  | 3749.25  | 3696.64  | 4139.43  |
| hsa-miR-107/mmu-miR-107/rno-miR-107             | 587.52   | 602.05   | 561.86   | 782.61   | 602.05   | 744.48   | 681.37   | 744.48   | 691.97   | 506.27   |
| hsa-miR-10a*/mmu-miR-10a*/rno-miR-10a-3p        | 1012.68  | 959.39   | 860.89   | 959.39   | 867.57   | 899.99   | 876.75   | 867.57   | 836.65   | 769.59   |
| hsa-miR-10a/mmu-miR-10a/rno-miR-10a-5p          | 42426.20 | 42426.20 | 42426.20 | 42426.20 | 39259.30 | 35728.90 | 42426.20 | 42426.20 | 42426.20 | 42426.20 |
| hsa-miR-10b*/mmu-miR-10b*                       | 316.36   | 348.71   | 279.27   | 378.89   | 322.21   | 304.68   | 337.52   | 313.61   | 332.30   | 271.73   |
| hsa-miR-10b/mmu-miR-10b/rno-miR-10b             | 19679.00 | 27318.30 | 23594.80 | 22097.60 | 33481.70 | 25514.30 | 33481.70 | 31195.10 | 27025.15 | 31195.10 |
| hsa-miR-1197/mmu-miR-1197                       | 66.77    | 64.76    | 59.36    | 60.18    | 60.68    | 68.05    | 72.48    | 61.68    | 69.24    | 59.39    |
| hsa-miR-122/mmu-miR-122/rno-miR-122             | 69.05    | 73.36    | 76.32    | 86.84    | 181.25   | 95.14    | 93.07    | 98.16    | 85.19    | 88.09    |
| hsa-miR-124*/mmu-miR-124*/rno-miR-124*          | 74.14    | 74.55    | 86.66    | 61.36    | 80.55    | 72.92    | 104.23   | 76.17    | 68.63    | 103.14   |
| hsa-miR-124/mmu-miR-124/rno-miR-124             | 107.58   | 88.91    | 100.75   | 90.52    | 125.75   | 98.73    | 102.08   | 91.82    | 105.69   | 93.66    |
| hsa-miR-125a-3p/mmu-miR-125a-3p/rno-miR-125a-3p | 180.11   | 192.21   | 187.09   | 237.89   | 176.18   | 191.11   | 207.71   | 208.34   | 219.17   | 164.23   |
| hsa-miR-125a-5p/mmu-miR-125a-5p/rno-miR-125a-5p | 12568.70 | 13807.10 | 11197.80 | 12568.70 | 14644.90 | 10657.40 | 13807.10 | 13196.00 | 12269.60 | 13807.10 |
| hsa-miR-125b/mmu-miR-125b-5p/rno-miR-125b-5p    | 6816.14  | 9665.20  | 6517.41  | 6648.32  | 8544.39  | 5008.57  | 8544.39  | 6648.32  | 6170.55  | 8544.39  |
| hsa-miR-125b-1*/mmu-miR-125b-3p/rno-miR-125b-3p | 130.23   | 84.49    | 67.67    | 81.68    | 101.41   | 93.27    | 77.57    | 57.70    | 67.06    | 92.73    |
| hsa-miR-125b-2*/rno-miR-125b*                   | 109.07   | 83.70    | 81.68    | 78.18    | 92.59    | 86.95    | 81.88    | 89.50    | 79.05    | 88.43    |
| hsa-miR-126*/mmu-miR-126-5p/rno-miR-126*        | 126.46   | 128.39   | 112.59   | 149.30   | 154.75   | 134.55   | 100.91   | 157.48   | 130.58   | 92.19    |
| hsa-miR-126/mmu-miR-126-3p/rno-miR-126          | 985.55   | 554.64   | 628.46   | 915.50   | 437.05   | 848.32   | 512.30   | 959.39   | 791.31   | 450.05   |
| hsa-miR-127-3p/mmu-miR-127/rno-miR-127          | 81.14    | 105.64   | 84.34    | 77.17    | 78.84    | 72.48    | 89.41    | 104.43   | 81.11    | 102.39   |
| hsa-miR-1274a/mmu-miR-1274a                     | 1081.80  | 1209.86  | 1267.89  | 1101.27  | 1236.68  | 1101.27  | 1101.27  | 1171.02  | 964.57   | 999.41   |
| hsa-miR-127-5p/mmu-miR-127*                     | 69.05    | 64.23    | 67.41    | 111.27   | 65.57    | 56.90    | 60.78    | 67.25    | 72.78    | 68.02    |
| hsa-miR-128/mmu-miR-128/rno-miR-128             | 117.18   | 101.52   | 105.55   | 115.71   | 84.22    | 120.79   | 129.82   | 127.25   | 131.99   | 108.86   |
| hsa-miR-129-3p/mmu-miR-129-3p/rno-miR-129*      | 67.05    | 81.21    | 70.39    | 136.80   | 64.76    | 72.48    | 77.29    | 80.08    | 78.74    | 80.05    |
| hsa-miR-129-5p/mmu-miR-129-5p/rno-miR-129       | 168.86   | 183.27   | 215.86   | 207.71   | 144.68   | 198.41   | 194.05   | 169.82   | 196.63   | 235.10   |
| hsa-miR-1306/mmu-miR-1306                       | 64.02    | 62.25    | 60.20    | 62.97    | 55.73    | 62.69    | 61.98    | 57.00    | 65.22    | 51.32    |
| hsa-miR-130a/mmu-miR-130a/rno-miR-130a          | 13807.10 | 12568.70 | 12269.60 | 10657.40 | 10657.40 | 11197.80 | 10161.20 | 10657.40 | 10431.50 | 12568.70 |
| hsa-miR-130b*/mmu-miR-130b*                     | 123.61   | 123.82   | 131.67   | 105.98   | 95.32    | 119.71   | 96.89    | 106.32   | 123.21   | 115.21   |
| hsa-miR-130b/mmu-miR-130b/rno-miR-130b          | 90.06    | 106.05   | 108.32   | 90.09    | 81.62    | 104.39   | 105.71   | 116.05   | 101.42   | 116.96   |
| hsa-miR-132/mmu-miR-132/rno-miR-132             | 72.98    | 62.45    | 71.50    | 72.48    | 52.75    | 61.86    | 65.91    | 75.89    | 75.64    | 71.16    |
| hsa-miR-133a/mmu-miR-133a/rno-miR-133a          | 83.25    | 62.69    | 69.82    | 140.53   | 49.30    | 63.61    | 59.39    | 55.45    | 68.44    | 57.05    |
| hsa-miR-133b/mmu-miR-133b/rno-miR-133b          | 96.39    | 76.80    | 81.04    | 76.84    | 65.41    | 74.75    | 68.87    | 76.17    | 74.98    | 75.04    |
| hsa-miR-134/mmu-miR-134/rno-miR-134             | 69.05    | 61.37    | 52.75    | 56.08    | 47.98    | 49.25    | 48.65    | 61.32    | 49.38    | 57.05    |
| hsa-miR-135a*/mmu-miR-135a*                     | 222.07   | 80.43    | 85.05    | 75.64    | 145.82   | 87.38    | 81.88    | 71.93    | 72.36    | 98.00    |
| hsa-miR-135a/mmu-miR-135a/rno-miR-135a          | 95.55    | 188.93   | 96.27    | 96.89    | 110.93   | 87.77    | 149.30   | 110.52   | 96.34    | 127.48   |
| hsa-miR-135b/mmu-miR-135b/rno-miR-135b          | 91.36    | 161.80   | 111.27   | 145.00   | 168.14   | 160.82   | 168.14   | 202.48   | 145.65   | 149.30   |
| hsa-miR-137/mmu-miR-137/rno-miR-137             | 35.22    | 33.09    | 29.00    | 31.77    | 30.23    | 30.60    | 29.00    | 29.55    | 31.69    | 20.61    |
| hsa-miR-138/mmu-miR-138/rno-miR-138             | 78.14    | 64.23    | 70.39    | 85.91    | 63.91    | 88.64    | 77.29    | 102.39   | 86.98    | 62.69    |
| hsa-miR-138-1*/mmu-miR-138*/rno-miR-138*        | 947.74   | 969.02   | 835.00   | 493.67   | 690.09   | 485.05   | 549.21   | 587.52   | 490.48   | 796.48   |
| hsa-miR-139-3p/mmu-miR-139-3p/rno-miR-139-3p    | 70.66    | 80.43    | 79.39    | 81.04    | 66.16    | 78.91    | 84.07    | 77.07    | 76.50    | 76.32    |

|                                              |          |          |          |          |          |          |          |          |          |          |
|----------------------------------------------|----------|----------|----------|----------|----------|----------|----------|----------|----------|----------|
| hsa-miR-139-5p/mmu-miR-139-5p/rno-miR-139-5p | 60.78    | 56.16    | 74.83    | 62.38    | 50.20    | 54.48    | 61.98    | 63.93    | 58.56    | 77.50    |
| hsa-miR-140-3p/mmu-miR-140*/rno-miR-140*     | 1352.41  | 1414.43  | 947.74   | 1123.04  | 1074.18  | 1267.89  | 1247.48  | 1123.04  | 1077.64  | 1123.04  |
| hsa-miR-140-5p/mmu-miR-140/rno-miR-140       | 69.36    | 96.32    | 68.72    | 133.49   | 20.61    | 81.80    | 68.16    | 74.83    | 91.30    | 88.64    |
| hsa-miR-141/mmu-miR-141/rno-miR-141          | 1247.48  | 4243.93  | 1287.55  | 1247.48  | 3866.43  | 1533.55  | 4243.93  | 1903.08  | 1585.58  | 3866.43  |
| hsa-miR-142-3p/mmu-miR-142-3p/rno-miR-142-3p | 111.20   | 105.55   | 132.96   | 122.77   | 85.70    | 117.18   | 110.23   | 105.55   | 115.44   | 107.61   |
| hsa-miR-142-5p/mmu-miR-142-5p/rno-miR-142-5p | 33.39    | 35.82    | 30.23    | 33.73    | 52.34    | 42.82    | 30.60    | 29.00    | 35.65    | 37.69    |
| hsa-miR-143/mmu-miR-143/rno-miR-143          | 48.23    | 55.88    | 56.05    | 49.77    | 57.42    | 44.14    | 52.15    | 56.11    | 50.81    | 65.52    |
| hsa-miR-144/mmu-miR-144/rno-miR-144          | 44.86    | 44.71    | 45.52    | 45.18    | 41.58    | 44.98    | 44.43    | 52.68    | 42.05    | 2481.39  |
| hsa-miR-145*/mmu-miR-145*                    | 40.47    | 37.50    | 36.66    | 37.32    | 44.71    | 35.45    | 33.73    | 45.73    | 41.47    | 51.75    |
| hsa-miR-145/mmu-miR-145/rno-miR-145          | 57.86    | 70.45    | 56.48    | 55.34    | 64.68    | 60.36    | 57.87    | 69.42    | 63.31    | 54.48    |
| hsa-miR-146a/mmu-miR-146a/rno-miR-146a       | 91.25    | 113.39   | 86.66    | 98.30    | 117.52   | 87.38    | 105.71   | 100.34   | 97.15    | 112.18   |
| hsa-miR-146b-5p/mmu-miR-146b/rno-miR-146b    | 187.73   | 180.46   | 157.73   | 189.30   | 147.30   | 168.14   | 184.30   | 175.84   | 185.62   | 157.48   |
| hsa-miR-147b/mmu-miR-147/rno-miR-147         | 116.31   | 110.23   | 109.07   | 109.21   | 110.09   | 123.25   | 116.31   | 88.73    | 109.87   | 104.96   |
| hsa-miR-148a*/mmu-miR-148a*                  | 62.69    | 64.23    | 65.61    | 104.96   | 57.42    | 55.93    | 60.16    | 67.25    | 54.98    | 89.84    |
| hsa-miR-148a/mmu-miR-148a                    | 73.32    | 64.48    | 60.20    | 63.93    | 131.02   | 75.95    | 81.14    | 73.32    | 78.93    | 65.03    |
| hsa-miR-148b/mmu-miR-148b/rno-miR-148b-3p    | 406.84   | 398.61   | 307.93   | 421.68   | 309.66   | 490.39   | 452.03   | 534.50   | 444.09   | 378.89   |
| hsa-miR-149/mmu-miR-149                      | 218.77   | 182.86   | 189.90   | 233.34   | 137.77   | 206.27   | 179.00   | 228.39   | 204.22   | 160.48   |
| hsa-miR-150*/mmu-miR-150*                    | 48.93    | 50.48    | 49.82    | 48.32    | 71.01    | 46.48    | 53.02    | 45.11    | 55.25    | 49.75    |
| hsa-miR-150/mmu-miR-150/rno-miR-150          | 256.77   | 243.71   | 274.46   | 223.73   | 202.48   | 222.07   | 205.05   | 226.25   | 246.76   | 253.08   |
| hsa-miR-151-5p/mmu-miR-151-5p/rno-miR-151    | 1287.55  | 1029.14  | 915.50   | 1171.02  | 860.89   | 1287.55  | 959.39   | 1081.80  | 1081.04  | 807.98   |
| hsa-miR-152/mmu-miR-152/rno-miR-152          | 332.64   | 403.75   | 236.71   | 348.71   | 302.89   | 366.25   | 414.59   | 370.24   | 362.65   | 334.44   |
| hsa-miR-153/mmu-miR-153/rno-miR-153          | 50.48    | 42.57    | 45.73    | 41.58    | 47.39    | 46.71    | 41.80    | 42.07    | 49.92    | 44.86    |
| hsa-miR-154*/mmu-miR-154*                    | 68.85    | 70.20    | 75.14    | 64.36    | 73.36    | 68.77    | 63.93    | 61.98    | 84.03    | 73.36    |
| hsa-miR-154/mmu-miR-154/rno-miR-154          | 72.33    | 71.30    | 71.50    | 50.98    | 74.75    | 53.59    | 90.66    | 99.09    | 70.50    | 67.83    |
| hsa-miR-15a/mmu-miR-15a                      | 6517.41  | 6517.41  | 7211.14  | 6349.55  | 7038.25  | 5392.98  | 5883.82  | 5883.82  | 5798.17  | 6816.14  |
| hsa-miR-15b*/mmu-miR-15b*                    | 104.71   | 86.68    | 99.27    | 99.68    | 80.91    | 114.73   | 109.89   | 108.21   | 108.28   | 97.20    |
| hsa-miR-15b/mmu-miR-15b/rno-miR-15b          | 2608.39  | 2305.36  | 2025.80  | 3076.86  | 2258.39  | 3016.45  | 2729.68  | 3248.34  | 2834.05  | 2258.39  |
| hsa-miR-16/mmu-miR-16/rno-miR-16             | 28000.00 | 29653.20 | 26472.40 | 25514.30 | 28673.90 | 22097.60 | 28673.90 | 23594.80 | 24554.55 | 25514.30 |
| hsa-miR-17*/rno-miR-17-3p                    | 91.43    | 81.21    | 83.89    | 104.23   | 97.36    | 91.43    | 93.95    | 109.55   | 90.75    | 105.43   |
| hsa-miR-17/mmu-miR-17/rno-miR-17-5p          | 3135.41  | 3866.43  | 2729.68  | 2850.82  | 3135.41  | 2938.41  | 3076.86  | 3076.86  | 2561.00  | 3016.45  |
| hsa-miR-181a*/mmu-miR-181a-1*/rno-miR-181a*  | 95.55    | 102.46   | 108.32   | 123.37   | 82.35    | 105.64   | 107.77   | 135.96   | 118.63   | 103.32   |
| hsa-miR-181a/mmu-miR-181a/rno-miR-181a       | 1787.11  | 2126.86  | 1588.18  | 1533.55  | 2782.70  | 1903.08  | 2160.02  | 2160.02  | 1703.49  | 1937.00  |
| hsa-miR-181b/mmu-miR-181b/rno-miR-181b       | 313.61   | 302.89   | 306.73   | 331.43   | 362.73   | 393.68   | 310.66   | 408.55   | 329.63   | 239.52   |
| hsa-miR-181c/mmu-miR-181c/rno-miR-181c       | 60.68    | 67.32    | 64.93    | 65.41    | 85.05    | 62.69    | 75.14    | 68.25    | 63.97    | 67.83    |
| hsa-miR-181d/mmu-miR-181d/rno-miR-181d       | 1074.18  | 1499.59  | 1074.18  | 985.55   | 1060.80  | 1414.43  | 1335.39  | 1619.86  | 1091.85  | 1101.27  |
| hsa-miR-182/mmu-miR-182/rno-miR-182          | 14644.90 | 14644.90 | 12568.70 | 12269.60 | 13196.00 | 12568.70 | 10657.40 | 12568.70 | 11883.25 | 12269.60 |
| hsa-miR-183*/mmu-miR-183*                    | 322.21   | 346.71   | 320.55   | 408.55   | 299.09   | 296.91   | 320.55   | 323.68   | 346.64   | 335.91   |
| hsa-miR-183/mmu-miR-183/rno-miR-183          | 7433.09  | 6816.14  | 6037.30  | 6517.41  | 6648.32  | 5712.52  | 6201.14  | 6349.55  | 6816.14  | 6349.55  |
| hsa-miR-184/mmu-miR-184/rno-miR-184          | 317.23   | 334.44   | 424.98   | 299.09   | 383.23   | 344.05   | 270.43   | 295.16   | 280.70   | 370.24   |
| hsa-miR-185/mmu-miR-185/rno-miR-185          | 583.00   | 516.84   | 444.09   | 602.05   | 432.27   | 516.84   | 485.05   | 543.21   | 523.74   | 427.82   |
| hsa-miR-186/mmu-miR-186/rno-miR-186          | 300.75   | 235.91   | 278.25   | 344.05   | 184.30   | 293.34   | 247.17   | 300.75   | 300.82   | 237.89   |
| hsa-miR-187/mmu-miR-187/rno-miR-187          | 619.75   | 364.39   | 372.64   | 543.21   | 246.25   | 512.30   | 307.93   | 478.15   | 459.10   | 304.68   |
| hsa-miR-188-3p/mmu-miR-188-3p                | 97.61    | 108.11   | 92.73    | 108.55   | 87.43    | 89.27    | 89.41    | 115.09   | 89.17    | 122.30   |

|                                                     |          |          |          |          |          |          |          |          |          |          |
|-----------------------------------------------------|----------|----------|----------|----------|----------|----------|----------|----------|----------|----------|
| hsa-miR-188-5p/mmu-miR-188-5p/rno-miR-188           | 115.61   | 102.46   | 126.05   | 143.93   | 103.61   | 114.73   | 103.71   | 107.84   | 108.62   | 90.37    |
| hsa-miR-18a*/mmu-miR-18a*                           | 68.75    | 72.77    | 76.75    | 121.11   | 78.67    | 78.91    | 77.82    | 87.23    | 85.63    | 80.05    |
| hsa-miR-18a/mmu-miR-18a/rno-miR-18a                 | 493.67   | 573.61   | 378.89   | 573.61   | 549.21   | 554.64   | 663.68   | 521.00   | 512.30   | 554.64   |
| hsa-miR-190/mmu-miR-190/rno-miR-190                 | 2415.61  | 3561.01  | 1661.50  | 1903.08  | 3076.86  | 2258.39  | 2938.41  | 2102.59  | 2019.80  | 2608.39  |
| hsa-miR-190b/mmu-miR-190b                           | 104.43   | 81.21    | 78.57    | 91.82    | 74.61    | 103.14   | 79.70    | 99.68    | 96.24    | 84.39    |
| hsa-miR-191/mmu-miR-191/rno-miR-191                 | 3866.43  | 2782.70  | 2102.59  | 3135.41  | 2648.45  | 2561.00  | 2230.66  | 2608.39  | 2660.91  | 2160.02  |
| hsa-miR-192/mmu-miR-192/rno-miR-192                 | 197.39   | 157.73   | 164.98   | 188.93   | 112.46   | 173.77   | 154.48   | 181.25   | 175.27   | 150.68   |
| hsa-miR-193a-3p/mmu-miR-193/rno-miR-193             | 2561.00  | 1042.93  | 1372.16  | 2354.34  | 969.02   | 2526.77  | 1352.41  | 2648.45  | 2306.37  | 1112.34  |
| hsa-miR-194/mmu-miR-194/rno-miR-194                 | 249.27   | 217.89   | 240.75   | 302.89   | 183.99   | 257.59   | 220.71   | 309.66   | 288.42   | 209.16   |
| hsa-miR-195/mmu-miR-195/rno-miR-195                 | 284.14   | 307.93   | 352.66   | 355.93   | 285.55   | 313.61   | 313.61   | 464.52   | 338.91   | 273.11   |
| hsa-miR-196a*/mmu-miR-196a*/rno-miR-196a*           | 68.50    | 73.07    | 73.50    | 73.36    | 64.23    | 79.26    | 95.57    | 90.06    | 70.93    | 90.68    |
| hsa-miR-196a/mmu-miR-196a/rno-miR-196a              | 247.17   | 193.30   | 215.00   | 271.73   | 185.61   | 236.71   | 209.80   | 256.77   | 232.78   | 180.11   |
| hsa-miR-196b/mmu-miR-196b/rno-miR-196b              | 48.32    | 45.61    | 46.66    | 51.36    | 44.14    | 52.09    | 57.36    | 58.30    | 53.14    | 41.07    |
| hsa-miR-197/mmu-miR-197                             | 215.00   | 198.82   | 206.27   | 168.86   | 171.11   | 208.34   | 172.11   | 203.00   | 185.99   | 188.21   |
| hsa-miR-199a-3p/hsa-miR-199b-3p/mmu-miR-199a-3p/mmu | 51.50    | 83.05    | 53.02    | 57.20    | 56.80    | 52.68    | 44.98    | 48.98    | 52.19    | 51.75    |
| hsa-miR-199a-5p/mmu-miR-199a-5p/rno-miR-199a-5p     | 52.50    | 41.07    | 47.50    | 47.98    | 42.07    | 53.32    | 58.23    | 52.09    | 46.05    | 48.05    |
| hsa-miR-19a*/mmu-miR-19a*                           | 137.55   | 58.98    | 63.30    | 54.57    | 79.00    | 73.43    | 56.39    | 72.34    | 54.55    | 68.95    |
| hsa-miR-19a/mmu-miR-19a/rno-miR-19a                 | 1101.27  | 1171.02  | 1012.68  | 1414.43  | 1267.89  | 1937.00  | 1846.86  | 2195.20  | 1646.24  | 1314.64  |
| hsa-miR-19b/mmu-miR-19b/rno-miR-19b                 | 4730.59  | 5712.52  | 4730.59  | 5583.82  | 5712.52  | 5883.82  | 6517.41  | 6517.41  | 5810.56  | 6201.14  |
| hsa-miR-200a*/mmu-miR-200a*                         | 91.89    | 91.43    | 96.86    | 103.21   | 67.91    | 97.11    | 123.61   | 108.68   | 112.05   | 101.89   |
| hsa-miR-200a/mmu-miR-200a/rno-miR-200a              | 7211.14  | 7211.14  | 6648.32  | 7038.25  | 6816.14  | 6201.14  | 6648.32  | 6037.30  | 6675.55  | 7433.09  |
| hsa-miR-200b*/mmu-miR-200b*                         | 104.04   | 111.50   | 117.02   | 138.73   | 76.58    | 123.25   | 115.52   | 122.30   | 130.47   | 122.30   |
| hsa-miR-200b/mmu-miR-200b/rno-miR-200b              | 8809.30  | 7433.09  | 8544.39  | 8544.39  | 7863.34  | 7863.34  | 8809.30  | 8066.27  | 8203.87  | 8809.30  |
| hsa-miR-200c*/mmu-miR-200c*                         | 95.14    | 109.89   | 111.27   | 96.59    | 87.79    | 101.52   | 106.73   | 116.58   | 96.54    | 123.82   |
| hsa-miR-200c/mmu-miR-200c/rno-miR-200c              | 1060.80  | 3135.41  | 985.55   | 1012.68  | 2561.00  | 1123.04  | 2850.82  | 1149.77  | 1098.61  | 2648.45  |
| hsa-miR-203/mmu-miR-203/rno-miR-203                 | 349.59   | 304.68   | 297.86   | 250.75   | 309.66   | 255.50   | 300.75   | 284.14   | 261.43   | 266.09   |
| hsa-miR-204/mmu-miR-204/rno-miR-204                 | 155.85   | 127.93   | 113.64   | 122.02   | 256.77   | 136.39   | 176.18   | 132.23   | 142.60   | 131.32   |
| hsa-miR-205/mmu-miR-205/rno-miR-205                 | 142.82   | 184.98   | 131.67   | 145.55   | 136.52   | 153.64   | 201.09   | 140.53   | 146.02   | 165.77   |
| hsa-miR-206/mmu-miR-206/rno-miR-206                 | 74.36    | 96.32    | 81.32    | 100.80   | 109.98   | 94.30    | 107.77   | 86.75    | 98.74    | 109.98   |
| hsa-miR-208a/mmu-miR-208a/rno-miR-208               | 207.05   | 204.23   | 273.11   | 206.27   | 236.71   | 148.11   | 164.98   | 182.16   | 181.23   | 232.36   |
| hsa-miR-208b/mmu-miR-208b                           | 85.93    | 97.11    | 94.30    | 67.39    | 76.80    | 70.50    | 81.14    | 96.39    | 70.51    | 110.52   |
| hsa-miR-20a/mmu-miR-20a/rno-miR-20a                 | 2648.45  | 3016.45  | 2045.11  | 2415.61  | 2850.82  | 2729.68  | 2608.39  | 2782.70  | 2166.63  | 2526.77  |
| hsa-miR-20b/mmu-miR-20b                             | 115.61   | 75.64    | 68.95    | 73.02    | 65.24    | 97.11    | 73.36    | 101.98   | 74.47    | 93.66    |
| hsa-miR-21/mmu-miR-21/rno-miR-21                    | 26472.40 | 28673.90 | 28000.00 | 27318.30 | 31195.10 | 28673.90 | 29653.20 | 25514.30 | 24554.55 | 26472.40 |
| hsa-miR-210/mmu-miR-210/rno-miR-210                 | 12269.60 | 6349.55  | 9665.20  | 11197.80 | 6201.14  | 10161.20 | 6139.95  | 9665.20  | 9485.25  | 7211.14  |
| hsa-miR-212/mmu-miR-212/rno-miR-212                 | 66.32    | 64.76    | 68.39    | 67.39    | 62.73    | 71.86    | 63.61    | 83.36    | 73.08    | 84.90    |
| hsa-miR-214*/mmu-miR-214*                           | 57.37    | 57.96    | 56.05    | 52.86    | 70.23    | 55.48    | 58.23    | 71.45    | 60.23    | 58.55    |
| hsa-miR-214/mmu-miR-214/rno-miR-214                 | 95.14    | 75.64    | 437.05   | 104.23   | 82.84    | 83.07    | 104.89   | 98.41    | 111.65   | 129.82   |
| hsa-miR-216a/mmu-miR-216a/rno-miR-216a              | 123.25   | 83.50    | 64.93    | 57.37    | 192.77   | 89.27    | 72.70    | 66.91    | 64.48    | 76.73    |
| hsa-miR-216b/mmu-miR-216b                           | 53.88    | 53.64    | 49.82    | 49.77    | 51.98    | 44.14    | 54.77    | 45.73    | 51.09    | 48.39    |
| hsa-miR-217/mmu-miR-217/rno-miR-217                 | 55.18    | 66.45    | 51.61    | 53.27    | 52.95    | 53.86    | 54.40    | 53.27    | 56.25    | 56.11    |
| hsa-miR-218/mmu-miR-218/rno-miR-218                 | 106.50   | 98.48    | 101.41   | 109.64   | 197.39   | 114.30   | 132.34   | 134.08   | 119.59   | 104.39   |
| hsa-miR-218-2*/mmu-miR-218-2*/rno-miR-218*          | 100.86   | 101.18   | 117.52   | 99.68    | 88.57    | 94.50    | 100.68   | 115.52   | 101.40   | 98.82    |

|                                            |          |          |          |          |          |          |          |          |          |          |
|--------------------------------------------|----------|----------|----------|----------|----------|----------|----------|----------|----------|----------|
| hsa-miR-219-2-3p/rno-miR-219-2-3p          | 75.64    | 73.75    | 88.34    | 73.36    | 106.05   | 74.48    | 70.32    | 67.73    | 84.90    | 77.82    |
| hsa-miR-219-5p/mmu-miR-219/rno-miR-219-5p  | 113.39   | 99.27    | 116.05   | 123.50   | 167.11   | 129.23   | 136.80   | 132.61   | 125.73   | 109.27   |
| hsa-miR-22*/mmu-miR-22*/rno-miR-22*        | 401.07   | 385.84   | 296.91   | 437.05   | 289.41   | 401.07   | 380.73   | 398.61   | 404.81   | 317.23   |
| hsa-miR-22/mmu-miR-22/rno-miR-22           | 28673.90 | 35728.90 | 22097.60 | 29653.20 | 35728.90 | 31195.10 | 31195.10 | 28000.00 | 33462.00 | 33481.70 |
| hsa-miR-221/mmu-miR-221/rno-miR-221        | 466.30   | 757.80   | 539.57   | 705.86   | 947.74   | 652.89   | 769.59   | 821.93   | 579.99   | 649.52   |
| hsa-miR-222/mmu-miR-222/rno-miR-222        | 1236.68  | 1704.30  | 1042.93  | 1335.39  | 1533.55  | 1352.41  | 1558.32  | 1499.59  | 1267.52  | 1619.86  |
| hsa-miR-223/mmu-miR-223/rno-miR-223        | 122.82   | 139.00   | 132.96   | 134.08   | 120.34   | 162.68   | 146.34   | 147.75   | 146.90   | 132.75   |
| hsa-miR-224/mmu-miR-224/rno-miR-224        | 116.31   | 115.09   | 109.64   | 161.80   | 69.84    | 168.14   | 135.54   | 161.80   | 158.75   | 127.25   |
| hsa-miR-23a*/rno-miR-23a*                  | 105.55   | 100.34   | 110.33   | 125.75   | 91.53    | 109.77   | 127.32   | 123.50   | 119.67   | 127.02   |
| hsa-miR-23a/mmu-miR-23a/rno-miR-23a        | 22097.60 | 21159.30 | 16996.80 | 16996.80 | 16996.80 | 23594.80 | 19679.00 | 21159.30 | 19547.20 | 22097.60 |
| hsa-miR-23b/mmu-miR-23b/rno-miR-23b        | 33481.70 | 33481.70 | 27318.30 | 28673.90 | 26472.40 | 33481.70 | 35728.90 | 35728.90 | 31567.45 | 35728.90 |
| hsa-miR-24/mmu-miR-24/rno-miR-24           | 11197.80 | 11197.80 | 10657.40 | 13196.00 | 12568.70 | 14644.90 | 12568.70 | 15282.20 | 13920.45 | 10657.40 |
| hsa-miR-24-1*/mmu-miR-24-1*/rno-miR-24-1*  | 1042.93  | 947.74   | 821.93   | 1081.80  | 915.50   | 1335.39  | 1012.68  | 1314.64  | 1051.66  | 860.89   |
| hsa-miR-24-2*/mmu-miR-24-2*/rno-miR-24-2*  | 1372.16  | 1012.68  | 876.75   | 1112.34  | 835.00   | 1314.64  | 1060.80  | 1287.55  | 1209.25  | 848.32   |
| hsa-miR-25/mmu-miR-25/rno-miR-25           | 516.84   | 539.57   | 534.50   | 639.46   | 631.73   | 587.52   | 628.46   | 722.52   | 591.55   | 471.29   |
| hsa-miR-26a/mmu-miR-26a/rno-miR-26a        | 29653.20 | 31195.10 | 31195.10 | 33481.70 | 27318.30 | 24397.10 | 27318.30 | 24397.10 | 26198.55 | 28673.90 |
| hsa-miR-26b*/mmu-miR-26b*/rno-miR-26b*     | 121.55   | 104.39   | 123.25   | 127.93   | 248.18   | 138.14   | 140.53   | 130.11   | 133.58   | 109.07   |
| hsa-miR-26b/mmu-miR-26b/rno-miR-26b        | 6139.95  | 4588.39  | 5583.82  | 6037.30  | 5392.98  | 4862.45  | 4381.20  | 5583.82  | 5221.56  | 3950.14  |
| hsa-miR-27a*/mmu-miR-27a*/rno-miR-27a*     | 106.50   | 85.93    | 89.80    | 96.27    | 116.96   | 96.86    | 99.09    | 67.73    | 105.74   | 85.95    |
| hsa-miR-27a/mmu-miR-27a/rno-miR-27a        | 1588.18  | 1149.77  | 1391.73  | 1846.86  | 1455.73  | 2354.34  | 1588.18  | 2305.36  | 2087.30  | 1139.50  |
| hsa-miR-27b*/mmu-miR-27b*                  | 116.21   | 97.47    | 111.73   | 104.96   | 51.48    | 104.89   | 112.91   | 91.82    | 114.25   | 118.05   |
| hsa-miR-27b/mmu-miR-27b/rno-miR-27b        | 1267.89  | 1314.64  | 1123.04  | 1937.00  | 1287.55  | 2230.66  | 1787.11  | 2354.34  | 1974.10  | 1209.86  |
| hsa-miR-28-3p/rno-miR-28*                  | 63.91    | 54.08    | 44.80    | 47.16    | 42.25    | 51.07    | 56.62    | 44.37    | 52.80    | 49.34    |
| hsa-miR-28-5p/mmu-miR-28/rno-miR-28        | 108.11   | 115.61   | 114.66   | 181.71   | 106.32   | 156.68   | 156.68   | 187.09   | 179.65   | 119.41   |
| hsa-miR-296-3p/mmu-miR-296-3p/rno-miR-296  | 76.17    | 93.66    | 100.75   | 124.86   | 95.14    | 85.70    | 83.07    | 86.41    | 90.20    | 94.82    |
| hsa-miR-296-5p/mmu-miR-296-5p/rno-miR-296* | 109.44   | 122.82   | 116.46   | 128.86   | 110.59   | 141.32   | 187.73   | 150.91   | 160.83   | 148.11   |
| hsa-miR-297/mmu-miR-297a                   | 112.73   | 285.55   | 88.70    | 94.50    | 171.68   | 99.86    | 90.66    | 105.80   | 94.94    | 104.52   |
| hsa-miR-299-5p/mmu-miR-299*/rno-miR-299    | 83.80    | 90.64    | 113.30   | 85.42    | 87.70    | 84.39    | 96.07    | 104.16   | 83.55    | 114.50   |
| hsa-miR-29a*/mmu-miR-29a*/rno-miR-29a*     | 681.37   | 521.00   | 512.30   | 614.21   | 475.18   | 619.75   | 561.86   | 628.46   | 566.25   | 510.45   |
| hsa-miR-29a/mmu-miR-29a/rno-miR-29a        | 39259.30 | 22097.60 | 39259.30 | 35728.90 | 22097.60 | 29653.20 | 16996.80 | 29653.20 | 29934.50 | 23594.80 |
| hsa-miR-29b/mmu-miR-29b/rno-miR-29b        | 27318.30 | 12269.60 | 33481.70 | 39259.30 | 15282.20 | 49553.70 | 15282.20 | 49553.70 | 34605.30 | 16996.80 |
| hsa-miR-29b-1*/mmu-miR-29b*                | 131.46   | 124.39   | 124.21   | 150.91   | 102.57   | 151.80   | 137.55   | 169.20   | 146.35   | 146.34   |
| hsa-miR-29b-2*/rno-miR-29b-2*              | 55.88    | 61.64    | 61.12    | 71.50    | 55.52    | 71.50    | 61.98    | 98.73    | 71.76    | 61.77    |
| hsa-miR-29c*/mmu-miR-29c*/rno-miR-29c*     | 112.18   | 95.48    | 120.34   | 124.86   | 264.21   | 140.77   | 116.31   | 139.00   | 124.31   | 106.05   |
| hsa-miR-29c/mmu-miR-29c/rno-miR-29c        | 2782.70  | 1267.89  | 2648.45  | 2729.68  | 1352.41  | 2782.70  | 1414.43  | 3314.75  | 2512.00  | 1455.73  |
| hsa-miR-301a/mmu-miR-301a/rno-miR-301a     | 5392.98  | 5583.82  | 3076.86  | 3749.25  | 4381.20  | 4381.20  | 4862.45  | 4041.27  | 3950.14  | 4381.20  |
| hsa-miR-302a/mmu-miR-302a                  | 393.68   | 383.23   | 395.82   | 722.52   | 281.75   | 573.61   | 352.66   | 512.30   | 563.14   | 307.93   |
| hsa-miR-302b/mmu-miR-302b                  | 88.27    | 81.80    | 90.98    | 81.41    | 66.66    | 89.27    | 88.34    | 78.52    | 85.13    | 74.55    |
| hsa-miR-302c/mmu-miR-302c                  | 87.38    | 87.07    | 89.62    | 88.00    | 74.55    | 95.48    | 84.07    | 86.16    | 93.46    | 76.32    |
| hsa-miR-302d/mmu-miR-302d                  | 103.32   | 102.66   | 91.75    | 89.50    | 92.14    | 98.36    | 106.39   | 88.16    | 94.85    | 71.01    |
| hsa-miR-30a*/mmu-miR-30a*/rno-miR-30a*     | 337.52   | 266.09   | 326.24   | 410.32   | 293.34   | 351.39   | 291.43   | 380.73   | 353.27   | 228.39   |
| hsa-miR-30a/mmu-miR-30a/rno-miR-30a        | 4588.39  | 2850.82  | 3248.34  | 4381.20  | 3314.75  | 4041.27  | 3314.75  | 4139.43  | 4055.18  | 2782.70  |
| hsa-miR-30b/mmu-miR-30b/rno-miR-30b-5p     | 25514.30 | 23594.80 | 25514.30 | 26472.40 | 24397.10 | 28000.00 | 25514.30 | 28673.90 | 28336.95 | 24397.10 |

|                                              |          |          |          |          |          |          |          |          |          |          |
|----------------------------------------------|----------|----------|----------|----------|----------|----------|----------|----------|----------|----------|
| hsa-miR-30c/mmu-miR-30c/rno-miR-30c          | 31195.10 | 28000.00 | 28673.90 | 31195.10 | 29653.20 | 27318.30 | 26472.40 | 27318.30 | 26895.35 | 29653.20 |
| hsa-miR-30c-1*/mmu-miR-30c-1*/rno-miR-30c-1* | 138.73   | 120.34   | 124.68   | 178.61   | 105.64   | 139.00   | 114.17   | 133.26   | 138.67   | 122.77   |
| hsa-miR-30c-2*/mmu-miR-30c-2*/rno-miR-30c-2* | 250.75   | 191.11   | 191.11   | 289.41   | 152.77   | 201.75   | 189.30   | 223.00   | 245.16   | 179.57   |
| hsa-miR-30d*/rno-miR-30d*                    | 178.61   | 119.41   | 104.52   | 105.43   | 97.95    | 119.41   | 96.07    | 100.86   | 103.50   | 104.96   |
| hsa-miR-30d/mmu-miR-30d/rno-miR-30d          | 3401.59  | 2025.80  | 1846.86  | 2526.77  | 1823.75  | 2608.39  | 1903.08  | 2258.39  | 2250.28  | 1787.11  |
| hsa-miR-30e*/mmu-miR-30e*/rno-miR-30e*       | 2354.34  | 1937.00  | 1727.89  | 2195.20  | 1727.89  | 2305.36  | 1704.30  | 2230.66  | 2102.57  | 1477.89  |
| hsa-miR-30e/mmu-miR-30e/rno-miR-30e          | 5712.52  | 4139.43  | 5392.98  | 5883.82  | 4139.43  | 7433.09  | 5209.24  | 7038.25  | 6342.81  | 4243.93  |
| hsa-miR-31*/mmu-miR-31*                      | 5883.82  | 4381.20  | 3866.43  | 5209.24  | 3749.25  | 4730.59  | 3749.25  | 4381.20  | 4487.26  | 3561.01  |
| hsa-miR-31/mmu-miR-31/rno-miR-31             | 8544.39  | 7038.25  | 6349.55  | 7433.09  | 5883.82  | 6517.41  | 5008.57  | 5209.24  | 6777.83  | 5392.98  |
| hsa-miR-32/mmu-miR-32/rno-miR-32             | 2850.82  | 2938.41  | 2126.86  | 2561.00  | 2415.61  | 2850.82  | 2526.77  | 2481.39  | 2481.37  | 2305.36  |
| hsa-miR-320a/mmu-miR-320/rno-miR-320         | 899.99   | 867.57   | 757.80   | 999.41   | 757.80   | 867.57   | 807.98   | 876.75   | 849.24   | 696.48   |
| hsa-miR-323-3p/mmu-miR-323-3p/rno-miR-323    | 48.93    | 50.88    | 55.88    | 50.30    | 48.98    | 47.08    | 51.14    | 58.95    | 52.20    | 57.05    |
| hsa-miR-323-5p/mmu-miR-323-5p/rno-miR-323*   | 105.55   | 105.24   | 95.23    | 68.39    | 79.70    | 95.14    | 93.07    | 79.35    | 97.34    | 69.82    |
| hsa-miR-324-3p/rno-miR-324-3p                | 110.52   | 140.16   | 119.07   | 144.55   | 116.58   | 139.77   | 171.11   | 160.82   | 169.00   | 137.07   |
| hsa-miR-324-5p/mmu-miR-324-5p/rno-miR-324-5p | 97.07    | 104.04   | 90.98    | 115.71   | 87.38    | 112.46   | 108.93   | 115.21   | 116.33   | 102.90   |
| hsa-miR-326/mmu-miR-326/rno-miR-326          | 85.57    | 94.50    | 108.32   | 122.46   | 91.75    | 95.80    | 102.80   | 103.71   | 123.47   | 107.11   |
| hsa-miR-328/mmu-miR-328/rno-miR-328          | 331.43   | 339.32   | 232.36   | 318.83   | 226.25   | 309.66   | 358.05   | 307.93   | 311.72   | 289.41   |
| hsa-miR-330-5p/mmu-miR-330/rno-miR-330       | 228.39   | 205.36   | 166.62   | 225.73   | 140.77   | 239.52   | 189.30   | 236.71   | 211.27   | 167.68   |
| hsa-miR-331-3p/mmu-miR-331-3p/rno-miR-331    | 534.50   | 480.25   | 340.50   | 480.25   | 344.05   | 510.45   | 475.18   | 485.05   | 463.85   | 406.84   |
| hsa-miR-331-5p/mmu-miR-331-5p                | 63.23    | 52.86    | 58.98    | 58.30    | 275.91   | 67.00    | 67.07    | 62.34    | 61.26    | 55.73    |
| hsa-miR-335*/mmu-miR-335-3p                  | 1979.40  | 1823.75  | 2195.20  | 2102.59  | 2160.02  | 1558.32  | 1661.50  | 1704.30  | 1830.21  | 1558.32  |
| hsa-miR-335/mmu-miR-335-5p/rno-miR-335       | 64.68    | 83.05    | 94.30    | 73.95    | 69.14    | 70.86    | 84.73    | 73.95    | 85.03    | 120.34   |
| hsa-miR-338-3p/mmu-miR-338-3p/rno-miR-338    | 90.06    | 225.73   | 107.11   | 101.18   | 89.05    | 100.34   | 96.07    | 96.39    | 93.83    | 89.09    |
| hsa-miR-338-5p/mmu-miR-338-5p/rno-miR-338*   | 83.80    | 93.45    | 93.45    | 84.24    | 76.98    | 96.86    | 100.34   | 108.21   | 94.43    | 89.56    |
| hsa-miR-339-3p/rno-miR-339-3p                | 55.48    | 57.48    | 53.94    | 55.18    | 52.55    | 65.02    | 61.68    | 68.25    | 63.83    | 61.77    |
| hsa-miR-339-5p/mmu-miR-339-5p/rno-miR-339-5p | 539.57   | 567.98   | 322.21   | 559.27   | 464.52   | 559.27   | 539.57   | 510.45   | 530.82   | 446.80   |
| hsa-miR-33a*/mmu-miR-33*                     | 64.68    | 65.61    | 70.68    | 69.67    | 56.08    | 65.39    | 67.83    | 76.73    | 69.69    | 74.55    |
| hsa-miR-33a/mmu-miR-33/rno-miR-33            | 930.55   | 1074.18  | 705.86   | 807.98   | 807.98   | 1012.68  | 959.39   | 796.48   | 765.74   | 729.46   |
| hsa-miR-340*/mmu-miR-340-3p/rno-miR-340-3p   | 271.73   | 270.43   | 255.50   | 261.98   | 239.52   | 273.11   | 264.21   | 273.11   | 248.80   | 207.05   |
| hsa-miR-340/mmu-miR-340-5p/rno-miR-340-5p    | 395.82   | 421.68   | 299.09   | 427.82   | 411.64   | 387.91   | 450.05   | 364.39   | 402.22   | 410.32   |
| hsa-miR-342-3p/mmu-miR-342-3p/rno-miR-342-3p | 867.57   | 899.99   | 696.48   | 930.55   | 899.99   | 930.55   | 999.41   | 1074.18  | 979.40   | 835.00   |
| hsa-miR-342-5p/mmu-miR-342-5p/rno-miR-342-5p | 85.25    | 95.48    | 93.89    | 97.34    | 126.80   | 99.86    | 93.07    | 122.02   | 113.91   | 97.52    |
| hsa-miR-34a/mmu-miR-34a/rno-miR-34a          | 3749.25  | 2729.68  | 2782.70  | 4243.93  | 2305.36  | 3950.14  | 2782.70  | 3866.43  | 3590.59  | 2354.34  |
| hsa-miR-34b/mmu-miR-34b-3p                   | 390.66   | 355.93   | 385.84   | 292.18   | 327.57   | 334.44   | 368.68   | 366.25   | 323.02   | 352.66   |
| hsa-miR-34c-5p/mmu-miR-34c/rno-miR-34c       | 345.21   | 587.52   | 248.18   | 353.69   | 390.66   | 355.93   | 559.27   | 346.71   | 339.55   | 432.27   |
| hsa-miR-361-5p/mmu-miR-361/rno-miR-361       | 796.48   | 807.98   | 577.86   | 663.68   | 614.21   | 705.86   | 782.61   | 782.61   | 657.44   | 675.42   |
| hsa-miR-363*/rno-miR-363*                    | 129.82   | 100.80   | 109.98   | 101.98   | 148.66   | 118.92   | 114.73   | 118.92   | 123.90   | 104.71   |
| hsa-miR-363/mmu-miR-363/rno-miR-363          | 88.39    | 77.07    | 69.82    | 77.89    | 191.68   | 82.11    | 96.07    | 88.16    | 89.57    | 77.50    |
| hsa-miR-365/mmu-miR-365/rno-miR-365          | 378.89   | 209.80   | 313.61   | 510.45   | 237.89   | 501.27   | 285.55   | 549.21   | 456.55   | 222.07   |
| hsa-miR-367/mmu-miR-367                      | 69.36    | 79.35    | 60.84    | 134.08   | 67.81    | 62.25    | 66.86    | 85.82    | 76.03    | 75.04    |
| hsa-miR-369-3p/mmu-miR-369-3p/rno-miR-369-3p | 62.42    | 65.02    | 65.14    | 62.38    | 57.66    | 55.14    | 77.82    | 63.39    | 69.05    | 71.45    |
| hsa-miR-369-5p/mmu-miR-369-5p/rno-miR-369-5p | 44.17    | 42.57    | 52.15    | 46.23    | 61.75    | 57.37    | 47.89    | 55.45    | 50.90    | 51.32    |
| hsa-miR-370/mmu-miR-370/rno-miR-370          | 82.82    | 65.02    | 60.50    | 65.03    | 104.43   | 69.50    | 68.48    | 70.68    | 63.44    | 59.39    |



|                                           |         |         |         |         |         |         |         |         |         |         |
|-------------------------------------------|---------|---------|---------|---------|---------|---------|---------|---------|---------|---------|
| hsa-miR-374b/mmu-miR-374/rno-miR-374      | 117.52  | 115.61  | 124.68  | 191.68  | 93.45   | 171.11  | 141.07  | 217.89  | 165.48  | 134.32  |
| hsa-miR-375/mmu-miR-375/rno-miR-375       | 164.98  | 134.55  | 163.05  | 160.23  | 120.23  | 160.82  | 132.34  | 175.27  | 151.49  | 144.55  |
| hsa-miR-377/mmu-miR-377/rno-miR-377       | 88.05   | 107.28  | 87.41   | 73.75   | 83.57   | 86.95   | 101.61  | 119.41  | 72.65   | 112.91  |
| hsa-miR-378*/mmu-miR-378*/rno-miR-378*    | 67.45   | 61.37   | 68.39   | 76.48   | 65.75   | 77.50   | 69.57   | 70.30   | 72.52   | 65.76   |
| hsa-miR-378/mmu-miR-378/rno-miR-378       | 1637.61 | 1060.80 | 1149.77 | 1704.30 | 1149.77 | 1499.59 | 1267.89 | 1352.41 | 1504.89 | 915.50  |
| hsa-miR-379*/rno-miR-379*                 | 44.68   | 45.98   | 52.75   | 45.80   | 41.28   | 38.07   | 41.80   | 45.73   | 46.77   | 47.30   |
| hsa-miR-379/mmu-miR-379/rno-miR-379       | 94.55   | 60.68   | 71.01   | 74.30   | 68.30   | 75.20   | 90.09   | 73.64   | 70.85   | 55.05   |
| hsa-miR-381/mmu-miR-381/rno-miR-381       | 52.86   | 52.55   | 51.61   | 42.57   | 54.40   | 48.89   | 55.22   | 51.75   | 42.98   | 61.77   |
| hsa-miR-382/mmu-miR-382/rno-miR-382       | 69.98   | 89.93   | 71.64   | 56.08   | 60.39   | 76.32   | 75.56   | 89.73   | 65.31   | 98.82   |
| hsa-miR-409-3p/mmu-miR-409-3p             | 77.07   | 88.05   | 83.25   | 55.00   | 62.05   | 71.50   | 70.32   | 72.34   | 65.99   | 80.91   |
| hsa-miR-409-5p/mmu-miR-409-5p             | 67.67   | 59.97   | 59.36   | 54.77   | 136.16  | 57.37   | 54.40   | 53.27   | 52.82   | 60.99   |
| hsa-miR-410/mmu-miR-410/rno-miR-410       | 47.11   | 32.43   | 43.59   | 34.30   | 37.90   | 40.34   | 65.00   | 35.45   | 33.08   | 50.88   |
| hsa-miR-411*/mmu-miR-411*                 | 60.68   | 60.91   | 56.05   | 100.14  | 54.25   | 57.37   | 52.15   | 54.17   | 59.44   | 56.48   |
| hsa-miR-411/mmu-miR-411/rno-miR-411       | 60.48   | 56.73   | 62.97   | 64.70   | 53.27   | 59.99   | 62.25   | 65.91   | 67.48   | 65.52   |
| hsa-miR-412/mmu-miR-412/rno-miR-412       | 94.10   | 128.55  | 76.58   | 150.68  | 76.12   | 76.58   | 66.39   | 80.08   | 77.11   | 69.82   |
| hsa-miR-421/mmu-miR-421                   | 95.14   | 98.66   | 112.18  | 106.82  | 220.05  | 97.52   | 113.75  | 111.86  | 105.48  | 96.27   |
| hsa-miR-423-3p/mmu-miR-423-3p/rno-miR-423 | 346.71  | 362.73  | 229.48  | 380.73  | 300.75  | 414.59  | 348.71  | 353.69  | 353.17  | 320.55  |
| hsa-miR-423-5p/mmu-miR-423-5p             | 594.68  | 639.46  | 454.99  | 577.86  | 454.99  | 549.21  | 587.52  | 506.27  | 507.38  | 559.27  |
| hsa-miR-425*/mmu-miR-425*                 | 86.16   | 98.23   | 92.14   | 113.39  | 85.30   | 95.14   | 85.95   | 112.12  | 109.88  | 95.14   |
| hsa-miR-425/mmu-miR-425/rno-miR-425       | 170.23  | 163.93  | 163.93  | 228.39  | 150.50  | 231.50  | 191.11  | 248.18  | 215.37  | 160.23  |
| hsa-miR-431*/mmu-miR-431*                 | 55.48   | 56.73   | 61.82   | 53.27   | 53.84   | 61.05   | 51.75   | 54.17   | 50.24   | 64.30   |
| hsa-miR-431/mmu-miR-431/rno-miR-431       | 119.25  | 65.14   | 66.05   | 65.70   | 73.36   | 67.73   | 62.78   | 62.34   | 62.15   | 72.30   |
| hsa-miR-433/mmu-miR-433/rno-miR-433       | 74.14   | 90.64   | 68.08   | 98.73   | 75.39   | 76.84   | 68.87   | 90.48   | 86.98   | 88.27   |
| hsa-miR-448/mmu-miR-448/rno-miR-448       | 98.36   | 91.43   | 91.25   | 67.39   | 68.48   | 84.86   | 83.66   | 95.90   | 77.30   | 109.55  |
| hsa-miR-449a/mmu-miR-449a/rno-miR-449a    | 60.39   | 65.24   | 68.08   | 58.95   | 44.14   | 61.86   | 61.36   | 63.16   | 55.45   | 50.59   |
| hsa-miR-450a/mmu-miR-450a-5p              | 279.27  | 306.73  | 289.41  | 372.64  | 254.77  | 418.59  | 304.68  | 459.96  | 367.31  | 240.75  |
| hsa-miR-451/mmu-miR-451/rno-miR-451       | 67.79   | 61.37   | 62.25   | 110.52  | 54.00   | 59.16   | 50.57   | 62.34   | 72.03   | 63.09   |
| hsa-miR-455-5p/mmu-miR-455*/rno-miR-455   | 318.83  | 440.18  | 261.98  | 332.64  | 353.69  | 352.66  | 377.14  | 359.36  | 353.03  | 309.66  |
| hsa-miR-484/mmu-miR-484/rno-miR-484       | 201.75  | 223.73  | 176.18  | 203.00  | 178.61  | 220.71  | 246.25  | 227.18  | 237.18  | 187.09  |
| hsa-miR-485-3p/mmu-miR-485*               | 129.82  | 127.48  | 155.85  | 144.55  | 136.39  | 141.93  | 143.30  | 142.52  | 162.15  | 151.18  |
| hsa-miR-485-5p/mmu-miR-485/rno-miR-485    | 114.50  | 107.11  | 109.21  | 100.14  | 129.23  | 131.67  | 84.07   | 115.84  | 99.23   | 130.64  |
| hsa-miR-486-5p/mmu-miR-486                | 103.61  | 131.02  | 118.33  | 116.96  | 107.58  | 139.77  | 117.34  | 117.84  | 135.96  | 121.45  |
| hsa-miR-487b/mmu-miR-487b/rno-miR-487b    | 608.51  | 366.25  | 485.05  | 418.59  | 393.68  | 320.55  | 446.80  | 374.97  | 364.49  | 359.36  |
| hsa-miR-490-3p/mmu-miR-490/rno-miR-490    | 90.98   | 78.23   | 84.49   | 86.68   | 71.01   | 86.05   | 80.82   | 83.70   | 73.92   | 86.30   |
| hsa-miR-491-5p/mmu-miR-491                | 59.20   | 68.48   | 60.20   | 60.76   | 59.97   | 60.70   | 63.93   | 62.73   | 69.42   | 62.11   |
| hsa-miR-493/rno-miR-493                   | 35.45   | 33.83   | 31.29   | 30.60   | 49.30   | 34.57   | 27.41   | 61.05   | 38.50   | 32.89   |
| hsa-miR-494/mmu-miR-494                   | 2025.80 | 1558.32 | 5209.24 | 2160.02 | 2045.11 | 2102.59 | 2195.20 | 1372.16 | 2497.93 | 3248.34 |
| hsa-miR-495/mmu-miR-495/rno-miR-495       | 56.39   | 47.30   | 57.86   | 49.30   | 51.18   | 55.64   | 59.89   | 49.85   | 76.33   | 68.20   |
| hsa-miR-496/mmu-miR-496/rno-miR-496       | 46.57   | 53.32   | 49.34   | 41.39   | 57.87   | 48.27   | 55.93   | 53.57   | 50.52   | 44.37   |
| hsa-miR-497/mmu-miR-497/rno-miR-497       | 41.64   | 41.58   | 34.93   | 44.71   | 52.18   | 40.70   | 47.16   | 43.05   | 46.82   | 38.07   |
| hsa-miR-499-5p/mmu-miR-499/rno-miR-499    | 41.64   | 42.57   | 38.07   | 37.69   | 36.04   | 50.30   | 76.32   | 74.30   | 44.95   | 38.70   |
| hsa-miR-501-3p/mmu-miR-501-3p             | 49.50   | 51.05   | 55.22   | 57.56   | 52.75   | 50.30   | 50.84   | 52.09   | 54.22   | 48.39   |
| hsa-miR-504/mmu-miR-504                   | 90.41   | 80.82   | 90.37   | 76.84   | 250.75  | 90.98   | 107.77  | 87.23   | 82.47   | 82.84   |

|                                              |          |          |          |          |          |          |          |          |          |          |
|----------------------------------------------|----------|----------|----------|----------|----------|----------|----------|----------|----------|----------|
| hsa-miR-505/rno-miR-505                      | 81.88    | 60.68    | 47.11    | 53.64    | 143.30   | 53.86    | 53.45    | 56.11    | 51.88    | 53.57    |
| hsa-miR-532-3p/mmu-miR-532-3p/rno-miR-532-3p | 152.41   | 196.68   | 167.68   | 220.05   | 178.02   | 217.89   | 169.20   | 197.39   | 183.78   | 172.11   |
| hsa-miR-532-5p/mmu-miR-532-5p/rno-miR-532-5p | 154.05   | 184.30   | 150.91   | 220.71   | 173.77   | 193.30   | 207.05   | 215.00   | 204.22   | 176.46   |
| hsa-miR-539/mmu-miR-539/rno-miR-539          | 80.50    | 139.77   | 89.19    | 86.20    | 78.18    | 95.80    | 86.45    | 82.46    | 87.81    | 84.90    |
| hsa-miR-542-3p/mmu-miR-542-3p/rno-miR-542-3p | 309.66   | 227.68   | 242.91   | 264.21   | 170.23   | 310.66   | 225.73   | 261.98   | 275.11   | 257.59   |
| hsa-miR-542-5p/mmu-miR-542-5p/rno-miR-542-5p | 223.73   | 164.98   | 180.46   | 209.16   | 150.91   | 200.55   | 155.48   | 207.05   | 185.66   | 155.85   |
| hsa-miR-543/mmu-miR-543                      | 63.23    | 54.47    | 57.86    | 47.16    | 119.41   | 58.30    | 57.36    | 65.00    | 53.77    | 51.32    |
| hsa-miR-551b/mmu-miR-551b/rno-miR-551b       | 482.84   | 501.27   | 619.75   | 587.52   | 521.00   | 454.99   | 506.27   | 421.68   | 572.63   | 549.21   |
| hsa-miR-568/mmu-miR-568/rno-miR-568          | 27.41    | 39.45    | 26.68    | 29.00    | 52.18    | 25.11    | 30.23    | 26.68    | 30.28    | 29.00    |
| hsa-miR-574-3p/mmu-miR-574-3p                | 128.86   | 145.82   | 158.18   | 150.24   | 133.96   | 137.07   | 158.18   | 165.36   | 168.75   | 199.34   |
| hsa-miR-574-5p/mmu-miR-574-5p                | 427.82   | 490.39   | 383.23   | 337.52   | 414.59   | 521.00   | 583.00   | 440.18   | 517.43   | 583.00   |
| hsa-miR-590-3p/mmu-miR-590-3p                | 14.05    | 20.61    | 14.05    | 61.36    | 24.27    | 14.05    | 14.05    | 14.05    | 24.01    | 14.05    |
| hsa-miR-590-5p/mmu-miR-590-5p                | 107.28   | 74.30    | 64.36    | 54.25    | 126.18   | 80.80    | 50.20    | 64.36    | 60.47    | 67.57    |
| hsa-miR-592/mmu-miR-592/rno-miR-592          | 131.46   | 130.64   | 122.14   | 131.92   | 107.34   | 144.15   | 144.36   | 144.55   | 135.75   | 120.05   |
| hsa-miR-615-3p/mmu-miR-615-3p                | 144.36   | 123.50   | 133.96   | 121.68   | 198.41   | 144.15   | 128.55   | 134.82   | 118.24   | 131.67   |
| hsa-miR-615-5p/mmu-miR-615-5p/rno-miR-615    | 112.18   | 130.11   | 109.44   | 161.80   | 102.57   | 116.46   | 110.52   | 109.98   | 127.55   | 106.05   |
| hsa-miR-652/mmu-miR-652/rno-miR-652          | 339.32   | 331.43   | 280.21   | 366.25   | 269.18   | 326.24   | 314.98   | 351.39   | 306.19   | 291.43   |
| hsa-miR-653/mmu-miR-653                      | 83.80    | 91.43    | 80.08    | 71.50    | 120.79   | 72.02    | 64.30    | 69.14    | 80.32    | 64.00    |
| hsa-miR-654-3p/mmu-miR-654-3p                | 90.68    | 98.23    | 83.89    | 93.66    | 73.11    | 103.14   | 89.41    | 84.63    | 95.64    | 75.80    |
| hsa-miR-668/mmu-miR-668/rno-miR-668          | 201.75   | 135.05   | 132.75   | 132.96   | 175.27   | 160.23   | 155.85   | 150.68   | 131.93   | 137.07   |
| hsa-miR-671-3p/mmu-miR-671-3p/rno-miR-671    | 93.89    | 89.09    | 96.59    | 112.12   | 66.16    | 74.75    | 73.02    | 80.43    | 74.03    | 79.00    |
| hsa-miR-671-5p/mmu-miR-671-5p                | 53.18    | 47.30    | 45.52    | 43.55    | 87.62    | 52.09    | 45.80    | 50.16    | 66.66    | 58.55    |
| hsa-miR-7/mmu-miR-7a/rno-miR-7a              | 259.21   | 231.50   | 215.86   | 275.91   | 186.30   | 295.16   | 241.75   | 255.50   | 237.98   | 223.73   |
| hsa-miR-708*/mmu-miR-708*/rno-miR-708*       | 73.64    | 78.52    | 76.07    | 76.48    | 58.66    | 60.50    | 68.16    | 71.16    | 75.18    | 71.16    |
| hsa-miR-708/mmu-miR-708/rno-miR-708          | 63.61    | 73.07    | 72.85    | 71.50    | 66.16    | 72.48    | 70.77    | 70.68    | 68.65    | 67.05    |
| hsa-miR-7-1*/mmu-miR-7a*/rno-miR-7a*         | 81.36    | 68.30    | 77.02    | 76.84    | 69.84    | 84.07    | 80.82    | 89.19    | 85.13    | 95.80    |
| hsa-miR-720/mmu-miR-720                      | 24397.10 | 26472.40 | 24397.10 | 24397.10 | 25514.30 | 16996.80 | 22097.60 | 14644.90 | 19078.05 | 28000.00 |
| hsa-miR-744*/mmu-miR-744*                    | 61.77    | 57.42    | 74.83    | 70.20    | 47.11    | 65.64    | 60.78    | 65.32    | 61.14    | 53.86    |
| hsa-miR-744/mmu-miR-744                      | 757.80   | 848.32   | 493.67   | 690.09   | 652.89   | 631.73   | 744.48   | 646.64   | 662.47   | 681.37   |
| hsa-miR-758/mmu-miR-758/rno-miR-758          | 82.39    | 81.62    | 77.36    | 74.30    | 63.39    | 84.86    | 85.48    | 87.23    | 93.44    | 71.16    |
| hsa-miR-759/mmu-miR-759/rno-miR-759          | 50.80    | 54.47    | 49.57    | 51.82    | 40.47    | 44.55    | 58.83    | 65.61    | 60.64    | 52.15    |
| hsa-miR-760/mmu-miR-760/rno-miR-760-3p       | 92.27    | 107.58   | 81.32    | 83.23    | 104.71   | 93.89    | 90.37    | 93.07    | 104.76   | 79.00    |
| hsa-miR-761/mmu-miR-761/rno-miR-761          | 78.59    | 70.45    | 82.75    | 66.25    | 71.16    | 66.66    | 68.48    | 66.91    | 65.64    | 79.70    |
| hsa-miR-802/mmu-miR-802/rno-miR-802          | 59.02    | 60.68    | 57.59    | 54.25    | 51.48    | 55.14    | 63.23    | 66.20    | 55.51    | 72.48    |
| hsa-miR-873/mmu-miR-873/rno-miR-873          | 49.77    | 55.34    | 50.98    | 54.25    | 79.70    | 49.85    | 50.84    | 60.78    | 57.84    | 57.66    |
| hsa-miR-874/mmu-miR-874/rno-miR-874          | 152.77   | 156.68   | 135.36   | 98.48    | 118.64   | 127.25   | 143.93   | 136.39   | 113.89   | 166.11   |
| hsa-miR-875-5p/mmu-miR-875-5p/rno-miR-875    | 38.20    | 39.80    | 35.22    | 34.30    | 41.28    | 39.11    | 49.60    | 36.52    | 37.61    | 33.73    |
| hsa-miR-877*/mmu-miR-877*                    | 124.52   | 142.82   | 136.16   | 139.00   | 123.25   | 154.48   | 141.93   | 159.46   | 165.67   | 132.61   |
| hsa-miR-877/mmu-miR-877/rno-miR-877          | 85.75    | 99.86    | 133.96   | 92.59    | 119.07   | 109.21   | 131.46   | 100.02   | 104.06   | 139.55   |
| hsa-miR-9*/mmu-miR-9*/rno-miR-9*             | 1314.64  | 1112.34  | 867.57   | 1267.89  | 1123.04  | 1209.86  | 1081.80  | 999.41   | 1163.66  | 899.99   |
| hsa-miR-9/mmu-miR-9/rno-miR-9                | 628.46   | 649.52   | 649.52   | 947.74   | 675.42   | 969.02   | 757.80   | 985.55   | 749.34   | 521.00   |
| hsa-miR-92b/mmu-miR-92b/rno-miR-92b          | 84.36    | 214.21   | 91.25    | 136.16   | 90.37    | 111.36   | 176.96   | 168.59   | 170.18   | 139.00   |
| hsa-miR-93*/mmu-miR-93*                      | 79.23    | 81.62    | 72.23    | 73.75    | 117.18   | 79.26    | 68.48    | 82.20    | 78.53    | 85.48    |

|                                              |         |         |         |         |         |         |         |         |         |         |
|----------------------------------------------|---------|---------|---------|---------|---------|---------|---------|---------|---------|---------|
| hsa-miR-93/mmu-miR-93/rno-miR-93             | 2230.66 | 2561.00 | 1637.61 | 2045.11 | 2025.80 | 2126.86 | 2258.39 | 2126.86 | 1880.38 | 1903.08 |
| hsa-miR-935/rno-miR-935                      | 59.99   | 70.20   | 63.30   | 56.75   | 57.82   | 121.75  | 53.86   | 62.73   | 57.79   | 66.14   |
| hsa-miR-96/mmu-miR-96/rno-miR-96             | 6648.32 | 6201.14 | 5883.82 | 6816.14 | 6037.30 | 7038.25 | 6037.30 | 6139.95 | 6275.35 | 5583.82 |
| hsa-miR-98/mmu-miR-98/rno-miR-98             | 3644.02 | 3950.14 | 4041.27 | 3866.43 | 5209.24 | 4139.43 | 4041.27 | 6201.14 | 4128.46 | 3401.59 |
| hsa-miR-99a/mmu-miR-99a/rno-miR-99a          | 72.98   | 65.24   | 59.36   | 73.02   | 57.20   | 72.48   | 64.56   | 80.08   | 66.95   | 75.80   |
| hsa-miR-99b*/mmu-miR-99b*/rno-miR-99b*       | 245.32  | 275.91  | 190.61  | 234.48  | 188.21  | 205.05  | 208.34  | 235.91  | 191.06  | 218.77  |
| hsa-miR-99b/mmu-miR-99b/rno-miR-99b          | 5583.82 | 5883.82 | 4139.43 | 5392.98 | 5583.82 | 4243.93 | 5392.98 | 4862.45 | 5035.85 | 6037.30 |
| hsa-miRPlus-C1049/mmu-miR-133a*              | 50.48   | 48.72   | 50.34   | 62.97   | 45.52   | 45.45   | 44.98   | 48.44   | 50.66   | 49.34   |
| hsa-miRPlus-D1090/mmu-miR-872/rno-miR-872    | 192.77  | 172.57  | 197.39  | 227.18  | 157.11  | 235.91  | 206.27  | 240.75  | 226.70  | 183.27  |
| hsa-miRPlus-D1100/mmu-miR-674/rno-miR-674-5p | 344.05  | 296.91  | 293.34  | 424.98  | 259.21  | 337.52  | 273.86  | 332.64  | 339.67  | 225.73  |
| hsa-miRPlus-D1120/mmu-miR-383/rno-miR-383    | 46.86   | 34.93   | 49.34   | 54.25   | 44.43   | 51.43   | 38.20   | 40.70   | 40.09   | 44.68   |
| hsv1-miR-H1                                  | 85.25   | 101.71  | 102.66  | 139.25  | 88.09   | 89.93   | 87.27   | 103.71  | 91.22   | 124.39  |
| hsv1-miR-H2-3p                               | 312.27  | 337.52  | 310.66  | 160.23  | 291.43  | 189.30  | 213.07  | 233.34  | 161.62  | 287.11  |
| hsv1-miR-H2-5p                               | 82.14   | 80.43   | 75.36   | 71.89   | 100.91  | 95.48   | 77.82   | 69.82   | 75.57   | 89.09   |
| hsv1-miR-H3                                  | 90.98   | 74.55   | 83.57   | 75.64   | 129.59  | 75.95   | 66.39   | 67.25   | 73.74   | 65.03   |
| hsv1-miR-H4-3p                               | 652.89  | 835.00  | 587.52  | 539.57  | 561.86  | 534.50  | 554.64  | 567.98  | 505.33  | 543.21  |
| hsv1-miR-H4-5p                               | 62.42   | 65.91   | 64.68   | 62.97   | 72.41   | 61.59   | 51.14   | 57.70   | 51.11   | 68.95   |
| hsv1-miR-H5                                  | 291.43  | 261.98  | 270.43  | 414.59  | 283.16  | 314.98  | 310.66  | 444.09  | 364.24  | 273.86  |
| hsv1-miR-H6                                  | 366.25  | 368.68  | 398.61  | 307.93  | 497.07  | 385.84  | 334.44  | 281.05  | 367.59  | 332.64  |
| hsv1-miR-H7                                  | 26.68   | 36.52   | 33.73   | 77.17   | 32.89   | 32.08   | 32.43   | 32.08   | 46.73   | 35.22   |
| hsv1-miR-H7*                                 | 521.00  | 561.86  | 516.84  | 487.52  | 628.46  | 471.29  | 543.21  | 446.80  | 501.92  | 619.75  |
| hsv1-miR-H8                                  | 89.05   | 72.11   | 74.23   | 72.48   | 104.96  | 73.14   | 76.61   | 77.07   | 72.45   | 90.37   |
| hsv1-miR-H8*                                 | 184.30  | 207.05  | 186.30  | 190.61  | 158.18  | 238.74  | 234.48  | 211.75  | 203.21  | 189.30  |
| hsv2-miR-H2                                  | 57.09   | 61.37   | 49.82   | 45.52   | 131.67  | 45.55   | 50.84   | 51.75   | 46.16   | 49.20   |
| hsv2-miR-H3                                  | 74.55   | 62.69   | 70.09   | 57.20   | 152.02  | 59.99   | 69.18   | 71.93   | 60.74   | 73.36   |
| hsv2-miR-H4-3p                               | 58.11   | 61.98   | 53.57   | 52.68   | 124.86  | 51.43   | 48.05   | 49.57   | 51.06   | 47.69   |
| hsv2-miR-H4-5p                               | 50.98   | 53.32   | 63.61   | 49.77   | 53.88   | 47.65   | 78.52   | 57.26   | 56.42   | 58.55   |
| jcv-miR-J1-5p                                | 45.55   | 46.66   | 49.57   | 46.23   | 45.52   | 48.89   | 44.14   | 51.75   | 45.22   | 64.76   |
| kshv-miR-K12-1                               | 49.20   | 53.88   | 66.91   | 51.82   | 47.39   | 45.55   | 51.14   | 85.82   | 55.20   | 78.18   |
| kshv-miR-K12-10a                             | 175.27  | 210.80  | 182.86  | 174.96  | 167.11  | 200.55  | 170.23  | 168.14  | 177.82  | 151.80  |
| kshv-miR-K12-10b                             | 198.82  | 151.80  | 165.77  | 166.11  | 247.17  | 189.90  | 196.68  | 150.24  | 213.88  | 155.48  |
| kshv-miR-K12-11                              | 97.34   | 104.04  | 77.82   | 81.98   | 113.64  | 86.95   | 106.39  | 96.39   | 93.08   | 77.50   |
| kshv-miR-K12-12                              | 122.46  | 115.52  | 162.39  | 112.12  | 105.64  | 113.46  | 149.93  | 130.11  | 111.52  | 126.46  |
| kshv-miR-K12-2                               | 76.17   | 78.23   | 81.68   | 60.39   | 79.00   | 68.39   | 80.82   | 89.73   | 73.84   | 93.66   |
| kshv-miR-K12-3                               | 127.02  | 120.64  | 130.64  | 100.14  | 160.48  | 101.52  | 120.64  | 124.21  | 103.62  | 129.43  |
| kshv-miR-K12-3*                              | 60.78   | 56.73   | 54.47   | 60.39   | 59.84   | 49.85   | 57.36   | 55.90   | 56.25   | 53.57   |
| kshv-miR-K12-4-3p                            | 83.25   | 77.25   | 64.93   | 72.75   | 66.91   | 63.20   | 89.73   | 77.07   | 76.50   | 68.02   |
| kshv-miR-K12-4-5p                            | 59.36   | 57.48   | 62.61   | 65.41   | 54.25   | 65.39   | 65.45   | 64.36   | 64.99   | 60.36   |
| kshv-miR-K12-5                               | 164.23  | 191.68  | 191.68  | 208.34  | 198.06  | 183.99  | 179.00  | 201.09  | 172.95  | 215.00  |
| kshv-miR-K12-6-3p                            | 127.68  | 126.68  | 111.73  | 116.21  | 96.59   | 101.98  | 105.71  | 106.61  | 113.13  | 124.68  |
| kshv-miR-K12-6-5p                            | 62.69   | 58.64   | 60.50   | 62.38   | 101.71  | 56.25   | 76.61   | 74.55   | 62.73   | 59.59   |
| kshv-miR-K12-7                               | 43.59   | 37.90   | 34.30   | 34.30   | 33.39   | 42.82   | 34.75   | 44.71   | 45.32   | 35.82   |
| kshv-miR-K12-8                               | 119.71  | 129.43  | 134.55  | 120.57  | 91.30   | 120.64  | 142.52  | 147.30  | 119.83  | 173.77  |

|                      |        |        |        |        |        |        |        |        |        |        |
|----------------------|--------|--------|--------|--------|--------|--------|--------|--------|--------|--------|
| kshv-miR-K12-9       | 65.39  | 52.25  | 53.94  | 55.90  | 53.11  | 57.37  | 68.48  | 55.18  | 63.71  | 62.69  |
| kshv-miR-K12-9*      | 20.61  | 48.72  | 53.94  | 42.14  | 36.43  | 49.85  | 55.93  | 40.23  | 44.20  | 45.86  |
| mcmv-miR-m01-1       | 60.39  | 60.68  | 50.98  | 56.37  | 74.75  | 63.20  | 61.05  | 51.36  | 59.99  | 55.45  |
| mcmv-miR-m01-2       | 68.20  | 64.48  | 65.91  | 65.70  | 80.55  | 74.48  | 65.91  | 44.07  | 64.76  | 60.99  |
| mcmv-miR-m01-2*      | 38.39  | 45.11  | 38.07  | 36.52  | 42.74  | 41.58  | 36.66  | 36.26  | 36.39  | 43.00  |
| mcmv-miR-m01-3       | 68.39  | 73.07  | 60.50  | 64.70  | 65.57  | 56.25  | 71.16  | 54.86  | 65.58  | 56.73  |
| mcmv-miR-m01-3*      | 80.87  | 69.84  | 61.12  | 68.39  | 116.73 | 63.61  | 54.40  | 70.30  | 71.11  | 60.36  |
| mcmv-miR-m01-4       | 94.55  | 66.79  | 60.20  | 78.59  | 63.61  | 70.86  | 81.88  | 78.52  | 90.08  | 88.84  |
| mcmv-miR-m01-4*      | 73.32  | 69.84  | 74.83  | 74.82  | 75.20  | 61.36  | 66.86  | 66.45  | 70.85  | 76.73  |
| mcmv-miR-m107-1-3p   | 56.84  | 56.16  | 61.41  | 53.27  | 139.77 | 61.05  | 81.55  | 84.24  | 51.65  | 57.66  |
| mcmv-miR-m107-1-5p   | 91.89  | 81.88  | 96.39  | 80.41  | 63.80  | 94.30  | 100.34 | 85.48  | 79.33  | 73.86  |
| mcmv-miR-m108-1      | 259.21 | 122.30 | 124.21 | 115.21 | 191.11 | 136.39 | 120.34 | 124.68 | 111.68 | 121.68 |
| mcmv-miR-m108-1*     | 62.69  | 69.64  | 69.50  | 72.75  | 53.84  | 74.48  | 62.38  | 72.70  | 63.49  | 62.42  |
| mcmv-miR-m108-2-3p   | 108.55 | 131.02 | 80.08  | 96.89  | 70.09  | 92.27  | 81.88  | 88.73  | 97.86  | 78.81  |
| mcmv-miR-m108-2-5p.1 | 61.32  | 162.39 | 73.36  | 63.27  | 99.86  | 68.39  | 65.45  | 69.42  | 64.91  | 66.39  |
| mcmv-miR-m108-2-5p.2 | 85.00  | 70.82  | 72.48  | 77.55  | 71.86  | 70.30  | 92.82  | 79.70  | 84.87  | 74.82  |
| mcmv-miR-m21-1       | 68.85  | 64.76  | 71.86  | 75.36  | 71.57  | 79.26  | 77.29  | 79.70  | 68.78  | 70.30  |
| mcmv-miR-m22-1       | 94.50  | 67.07  | 78.57  | 69.27  | 83.25  | 75.56  | 69.18  | 67.55  | 69.33  | 65.52  |
| mcmv-miR-M23-1-3p    | 116.96 | 127.25 | 131.67 | 101.36 | 172.98 | 108.32 | 96.89  | 104.16 | 94.55  | 86.30  |
| mcmv-miR-M23-1-5p    | 304.68 | 176.18 | 358.05 | 255.50 | 279.27 | 174.11 | 256.77 | 179.00 | 230.38 | 229.48 |
| mcmv-miR-M23-2       | 154.75 | 101.89 | 100.39 | 93.66  | 142.52 | 112.46 | 102.80 | 88.16  | 109.51 | 86.84  |
| mcmv-miR-M23-2*      | 115.21 | 120.34 | 120.64 | 132.61 | 107.77 | 151.18 | 151.80 | 139.77 | 146.45 | 131.92 |
| mcmv-miR-M44-1       | 122.14 | 122.30 | 192.21 | 90.52  | 85.52  | 104.89 | 117.02 | 116.31 | 111.47 | 94.82  |
| mcmv-miR-M55-1       | 55.02  | 74.05  | 64.36  | 67.39  | 58.11  | 70.68  | 61.36  | 68.25  | 66.21  | 58.98  |
| mcmv-miR-m59-1       | 99.11  | 122.82 | 101.89 | 97.80  | 92.14  | 117.18 | 101.80 | 110.23 | 111.16 | 89.56  |
| mcmv-miR-m59-2       | 42.74  | 45.61  | 45.18  | 43.59  | 39.80  | 39.98  | 39.45  | 42.57  | 45.38  | 39.45  |
| mcmv-miR-M87-1       | 81.88  | 58.98  | 65.39  | 58.30  | 64.76  | 67.73  | 67.07  | 58.30  | 63.10  | 59.99  |
| mcmv-miR-m88-1       | 269.18 | 238.74 | 334.44 | 253.08 | 243.71 | 193.30 | 249.27 | 205.36 | 243.44 | 220.71 |
| mcmv-miR-m88-1*      | 123.61 | 131.92 | 122.14 | 117.52 | 93.45  | 132.23 | 146.07 | 129.23 | 133.69 | 118.64 |
| mcmv-miR-M95-1-3p    | 60.48  | 58.98  | 58.39  | 58.30  | 45.73  | 58.60  | 56.90  | 56.11  | 66.17  | 58.55  |
| mcmv-miR-M95-1-5p    | 113.75 | 113.75 | 121.68 | 112.59 | 91.93  | 124.52 | 133.96 | 104.16 | 120.74 | 105.24 |
| mcv-miR-M1-3p        | 68.39  | 67.48  | 76.32  | 72.11  | 66.91  | 72.92  | 67.83  | 72.98  | 74.25  | 73.52  |
| mcv-miR-M1-5p        | 36.04  | 47.30  | 36.95  | 35.82  | 40.23  | 37.69  | 41.39  | 39.11  | 40.97  | 39.45  |
| mghv-miR-M1-1        | 48.65  | 46.89  | 78.84  | 73.02  | 79.23  | 45.18  | 48.98  | 44.07  | 52.42  | 47.93  |
| mghv-miR-M1-2        | 452.03 | 478.15 | 466.30 | 403.75 | 512.30 | 464.52 | 480.25 | 414.59 | 426.56 | 421.68 |
| mghv-miR-M1-3        | 88.39  | 91.43  | 91.43  | 89.19  | 85.52  | 108.59 | 92.45  | 100.59 | 95.17  | 117.34 |
| mghv-miR-M1-4        | 446.80 | 437.05 | 510.45 | 314.98 | 485.05 | 334.44 | 374.97 | 317.23 | 314.48 | 403.75 |
| mghv-miR-M1-5        | 182.16 | 173.25 | 118.33 | 95.98  | 314.98 | 129.59 | 108.93 | 112.25 | 107.80 | 114.50 |
| mghv-miR-M1-6        | 89.52  | 80.82  | 82.61  | 88.34  | 74.36  | 93.27  | 77.29  | 82.20  | 82.42  | 82.35  |
| mghv-miR-M1-7-3p     | 141.93 | 150.68 | 139.55 | 183.99 | 125.58 | 153.64 | 137.55 | 153.38 | 147.77 | 138.14 |
| mghv-miR-M1-7-5p     | 68.50  | 75.14  | 77.82  | 107.98 | 73.11  | 63.61  | 68.87  | 53.27  | 64.61  | 84.68  |
| mghv-miR-M1-8        | 163.05 | 222.07 | 175.27 | 227.68 | 139.25 | 230.30 | 248.18 | 188.93 | 221.40 | 192.77 |
| mghv-miR-M1-9        | 44.86  | 52.09  | 52.15  | 48.89  | 115.84 | 47.89  | 53.86  | 46.71  | 51.69  | 47.50  |

|                             |         |         |         |         |         |         |         |         |         |         |
|-----------------------------|---------|---------|---------|---------|---------|---------|---------|---------|---------|---------|
| mmu-let-7c-1*               | 102.57  | 80.43   | 79.39   | 72.48   | 123.37  | 65.64   | 65.91   | 68.48   | 73.65   | 81.88   |
| mmu-miR-101b/rno-miR-101b   | 274.46  | 291.43  | 223.00  | 345.21  | 210.80  | 287.11  | 279.27  | 322.21  | 295.11  | 255.50  |
| mmu-miR-105                 | 135.96  | 100.34  | 83.89   | 70.45   | 263.11  | 93.27   | 69.98   | 82.20   | 75.10   | 83.92   |
| mmu-miR-106a                | 1335.39 | 1661.50 | 1139.50 | 1588.18 | 1588.18 | 1619.86 | 1727.89 | 2025.80 | 1589.09 | 1588.18 |
| mmu-miR-1186                | 50.16   | 48.98   | 48.89   | 50.78   | 44.86   | 71.16   | 62.78   | 55.64   | 53.14   | 67.05   |
| mmu-miR-1187                | 283.16  | 380.73  | 203.00  | 243.71  | 266.09  | 440.18  | 332.64  | 291.43  | 355.93  | 380.73  |
| mmu-miR-1188                | 85.57   | 76.05   | 71.01   | 85.66   | 101.71  | 86.66   | 77.29   | 84.24   | 88.42   | 83.92   |
| mmu-miR-1190                | 96.50   | 102.66  | 125.07  | 140.77  | 85.93   | 110.52  | 107.02  | 97.91   | 112.30  | 89.84   |
| mmu-miR-1191                | 94.73   | 93.07   | 103.61  | 100.14  | 82.14   | 99.11   | 111.02  | 113.39  | 113.63  | 107.61  |
| mmu-miR-1192                | 782.61  | 696.48  | 1414.43 | 744.48  | 930.55  | 594.68  | 848.32  | 649.52  | 944.89  | 930.55  |
| mmu-miR-1193                | 78.14   | 83.92   | 85.42   | 83.50   | 149.30  | 71.86   | 76.95   | 76.17   | 75.69   | 83.50   |
| mmu-miR-1194                | 51.25   | 52.55   | 47.93   | 47.16   | 55.73   | 47.08   | 45.45   | 47.08   | 48.68   | 44.37   |
| mmu-miR-1195                | 108.32  | 91.89   | 79.39   | 90.34   | 90.41   | 93.27   | 120.05  | 95.23   | 98.63   | 100.39  |
| mmu-miR-1196                | 614.21  | 539.57  | 729.46  | 526.46  | 573.61  | 432.27  | 471.29  | 501.27  | 512.31  | 639.46  |
| mmu-miR-1198                | 191.68  | 165.77  | 184.98  | 139.77  | 143.93  | 141.59  | 127.68  | 153.38  | 127.94  | 139.55  |
| mmu-miR-1199                | 194.05  | 124.39  | 154.48  | 110.93  | 99.55   | 116.46  | 120.34  | 112.59  | 114.69  | 101.18  |
| mmu-miR-1224/rno-miR-1224   | 60.18   | 55.14   | 59.59   | 62.97   | 67.91   | 55.48   | 55.22   | 53.57   | 63.82   | 66.70   |
| mmu-miR-125b*               | 62.42   | 80.43   | 75.14   | 73.02   | 70.32   | 86.95   | 72.34   | 69.42   | 118.41  | 82.35   |
| mmu-miR-1-2-as              | 45.55   | 49.77   | 50.34   | 45.52   | 59.48   | 45.18   | 51.43   | 62.73   | 42.89   | 53.57   |
| mmu-miR-136                 | 76.73   | 68.95   | 85.42   | 76.48   | 58.83   | 79.26   | 101.61  | 82.20   | 79.30   | 92.82   |
| mmu-miR-136*                | 58.86   | 48.32   | 55.00   | 54.25   | 195.82  | 58.93   | 75.56   | 70.68   | 54.57   | 56.37   |
| mmu-miR-141*                | 97.61   | 108.86  | 83.89   | 93.95   | 104.89  | 100.68  | 116.31  | 77.43   | 106.49  | 115.71  |
| mmu-miR-146b*               | 73.86   | 60.39   | 60.50   | 59.29   | 70.68   | 66.39   | 64.30   | 55.90   | 63.90   | 67.05   |
| mmu-miR-151-3p/rno-miR-151* | 134.08  | 126.68  | 128.55  | 154.48  | 103.71  | 148.66  | 127.02  | 141.93  | 142.33  | 119.71  |
| mmu-miR-155                 | 501.27  | 328.89  | 414.59  | 567.98  | 334.44  | 480.25  | 355.93  | 554.64  | 454.35  | 314.98  |
| mmu-miR-15a*                | 104.43  | 86.45   | 80.80   | 83.50   | 80.91   | 86.45   | 79.93   | 87.23   | 91.67   | 82.64   |
| mmu-miR-16*                 | 97.61   | 115.92  | 117.66  | 123.98  | 99.68   | 110.84  | 121.55  | 131.32  | 129.49  | 125.32  |
| mmu-miR-17*                 | 189.90  | 215.86  | 180.11  | 231.50  | 164.98  | 188.93  | 200.55  | 220.05  | 189.66  | 203.00  |
| mmu-miR-181a-2*             | 25.11   | 34.57   | 25.11   | 21.98   | 27.41   | 28.48   | 43.39   | 27.41   | 27.78   | 33.73   |
| mmu-miR-1839-3p             | 1414.43 | 1533.55 | 1081.80 | 1139.50 | 1139.50 | 959.39  | 899.99  | 1029.14 | 965.06  | 959.39  |
| mmu-miR-1839-5p             | 106.82  | 134.08  | 131.02  | 173.77  | 121.11  | 149.30  | 147.30  | 182.86  | 167.02  | 131.46  |
| mmu-miR-186*                | 59.59   | 60.68   | 64.02   | 64.36   | 65.14   | 60.70   | 60.61   | 68.48   | 67.15   | 50.88   |
| mmu-miR-1892                | 105.11  | 92.14   | 115.71  | 114.73  | 94.50   | 103.41  | 112.91  | 113.64  | 102.19  | 120.05  |
| mmu-miR-1893                | 88.70   | 103.71  | 109.98  | 93.27   | 205.05  | 90.41   | 111.50  | 99.68   | 117.00  | 100.80  |
| mmu-miR-1894-3p             | 91.89   | 85.14   | 131.67  | 151.55  | 79.26   | 107.46  | 98.41   | 74.55   | 112.89  | 123.37  |
| mmu-miR-1894-5p             | 198.41  | 237.89  | 200.55  | 142.52  | 148.66  | 220.05  | 168.14  | 179.00  | 148.75  | 178.02  |
| mmu-miR-1895                | 85.25   | 88.05   | 90.37   | 93.27   | 85.52   | 90.68   | 128.21  | 90.06   | 115.00  | 99.57   |
| mmu-miR-1896                | 63.61   | 156.68  | 67.41   | 60.18   | 61.12   | 76.84   | 71.86   | 80.43   | 71.66   | 63.09   |
| mmu-miR-1897-3p             | 61.32   | 55.14   | 54.47   | 55.59   | 56.08   | 56.90   | 51.75   | 58.30   | 60.11   | 61.37   |
| mmu-miR-1897-5p             | 408.55  | 487.52  | 501.27  | 516.84  | 459.96  | 475.18  | 722.52  | 539.57  | 584.48  | 631.73  |
| mmu-miR-1898                | 63.91   | 48.32   | 54.25   | 57.56   | 53.52   | 59.57   | 60.61   | 58.95   | 63.80   | 63.09   |
| mmu-miR-1899                | 61.32   | 59.97   | 84.63   | 69.27   | 68.95   | 72.02   | 73.36   | 75.89   | 74.91   | 81.88   |
| mmu-miR-18b                 | 88.05   | 93.07   | 99.27   | 98.73   | 112.46  | 105.98  | 95.27   | 95.48   | 117.03  | 93.39   |

|                             |          |          |          |          |          |          |          |          |          |          |
|-----------------------------|----------|----------|----------|----------|----------|----------|----------|----------|----------|----------|
| mmu-miR-1900                | 577.86   | 631.73   | 646.64   | 594.68   | 722.52   | 567.98   | 639.46   | 497.07   | 612.25   | 652.89   |
| mmu-miR-1901                | 57.09    | 58.42    | 56.80    | 50.48    | 110.52   | 57.37    | 73.70    | 77.82    | 87.59    | 60.68    |
| mmu-miR-1902                | 478.15   | 454.99   | 291.43   | 240.75   | 372.64   | 267.21   | 323.68   | 349.59   | 235.94   | 421.68   |
| mmu-miR-1903                | 243.71   | 247.17   | 351.39   | 231.50   | 255.50   | 227.18   | 220.05   | 239.52   | 244.97   | 284.14   |
| mmu-miR-1904                | 139.55   | 187.09   | 80.50    | 71.07    | 67.67    | 97.91    | 75.56    | 66.91    | 76.52    | 80.39    |
| mmu-miR-1905                | 121.75   | 68.75    | 58.39    | 66.25    | 109.55   | 80.80    | 69.36    | 74.55    | 61.89    | 79.59    |
| mmu-miR-1906                | 46.57    | 47.65    | 50.16    | 75.14    | 55.52    | 48.27    | 51.75    | 48.44    | 50.52    | 107.11   |
| mmu-miR-1907                | 55.88    | 92.36    | 57.59    | 55.59    | 56.62    | 59.16    | 94.55    | 55.81    | 85.49    | 68.48    |
| mmu-miR-191*                | 99.48    | 88.91    | 90.68    | 96.27    | 76.61    | 105.64   | 99.95    | 97.34    | 100.01   | 80.91    |
| mmu-miR-1927                | 93.27    | 71.16    | 68.95    | 68.02    | 74.14    | 62.25    | 78.23    | 52.68    | 80.22    | 64.30    |
| mmu-miR-1928                | 50.80    | 57.70    | 51.82    | 58.62    | 102.30   | 59.99    | 46.86    | 54.86    | 59.33    | 56.73    |
| mmu-miR-1929                | 66.77    | 76.05    | 96.05    | 91.82    | 78.30    | 90.98    | 84.39    | 97.91    | 120.71   | 113.83   |
| mmu-miR-193*/rno-miR-193*   | 76.41    | 76.66    | 84.34    | 88.00    | 65.91    | 90.09    | 81.14    | 96.86    | 85.10    | 71.45    |
| mmu-miR-1930                | 60.99    | 55.88    | 56.05    | 54.77    | 94.30    | 62.69    | 57.87    | 58.30    | 58.42    | 61.77    |
| mmu-miR-1931                | 95.55    | 69.84    | 46.86    | 69.27    | 194.05   | 71.16    | 59.39    | 44.07    | 61.32    | 59.39    |
| mmu-miR-1932                | 81.36    | 67.07    | 67.07    | 63.61    | 56.39    | 75.95    | 71.16    | 67.91    | 67.76    | 64.41    |
| mmu-miR-1933-3p             | 63.23    | 51.75    | 50.98    | 45.52    | 72.75    | 50.69    | 47.16    | 50.16    | 45.58    | 50.34    |
| mmu-miR-1933-5p             | 49.20    | 47.93    | 56.05    | 56.37    | 45.52    | 45.86    | 48.98    | 48.98    | 49.39    | 58.11    |
| mmu-miR-1934                | 145.00   | 150.50   | 133.49   | 134.82   | 108.93   | 130.46   | 122.02   | 122.77   | 127.49   | 135.36   |
| mmu-miR-1935                | 99.11    | 131.02   | 148.11   | 132.61   | 110.09   | 137.07   | 153.64   | 134.82   | 139.17   | 161.25   |
| mmu-miR-1936                | 64.68    | 65.61    | 62.61    | 46.23    | 55.34    | 57.05    | 75.14    | 77.07    | 53.22    | 67.57    |
| mmu-miR-1937a               | 64025.30 | 64025.30 | 64025.30 | 64025.30 | 62957.80 | 62957.80 | 64025.30 | 58128.60 | 63491.55 | 64025.30 |
| mmu-miR-1937a/mmu-miR-1937b | 62957.80 | 62957.80 | 62957.80 | 58128.60 | 64025.30 | 64025.30 | 62957.80 | 64025.30 | 60543.20 | 62957.80 |
| mmu-miR-1937c               | 3248.34  | 2608.39  | 3401.59  | 4730.59  | 3248.34  | 1823.75  | 2354.34  | 2526.77  | 2964.18  | 2729.68  |
| mmu-miR-1938                | 64.02    | 113.39   | 73.50    | 71.07    | 108.93   | 59.31    | 61.36    | 68.25    | 61.69    | 56.48    |
| mmu-miR-1939                | 2481.39  | 2160.02  | 2354.34  | 2938.41  | 2102.59  | 2045.11  | 2102.59  | 2415.61  | 2601.86  | 2025.80  |
| mmu-miR-193b                | 71.93    | 96.32    | 74.07    | 74.82    | 64.02    | 85.30    | 84.07    | 81.64    | 83.55    | 70.86    |
| mmu-miR-1940                | 53.88    | 116.73   | 64.68    | 57.86    | 69.84    | 50.69    | 54.40    | 58.30    | 69.86    | 79.39    |
| mmu-miR-1941-3p             | 224.48   | 299.09   | 268.46   | 221.35   | 227.18   | 222.07   | 240.75   | 249.27   | 257.88   | 261.98   |
| mmu-miR-1941-5p             | 60.39    | 64.48    | 76.75    | 107.98   | 51.73    | 59.99    | 52.68    | 57.00    | 74.63    | 55.05    |
| mmu-miR-1942                | 63.23    | 45.61    | 48.32    | 58.95    | 55.52    | 49.25    | 49.60    | 50.45    | 69.09    | 42.46    |
| mmu-miR-1943                | 65.39    | 59.39    | 62.61    | 103.61   | 52.15    | 51.07    | 58.23    | 60.78    | 60.59    | 64.52    |
| mmu-miR-1944                | 6201.14  | 6037.30  | 7433.09  | 7211.14  | 7211.14  | 6648.32  | 7211.14  | 7211.14  | 7235.67  | 6139.95  |
| mmu-miR-1945                | 59.59    | 64.48    | 66.77    | 95.32    | 61.93    | 59.57    | 56.90    | 65.61    | 62.04    | 62.42    |
| mmu-miR-1946a               | 57.86    | 129.02   | 68.39    | 63.61    | 55.52    | 68.39    | 55.93    | 66.91    | 66.26    | 67.83    |
| mmu-miR-1946b               | 80.36    | 79.50    | 82.14    | 70.68    | 164.23   | 84.86    | 96.89    | 83.89    | 98.59    | 84.24    |
| mmu-miR-1947                | 54.40    | 66.16    | 48.89    | 89.93    | 49.55    | 58.60    | 55.93    | 45.11    | 53.44    | 46.89    |
| mmu-miR-1948                | 38.70    | 41.39    | 38.70    | 44.37    | 36.66    | 42.14    | 37.32    | 34.75    | 41.50    | 44.07    |
| mmu-miR-1949                | 744.48   | 782.61   | 652.89   | 796.48   | 577.86   | 663.68   | 577.86   | 757.80   | 634.45   | 482.84   |
| mmu-miR-1950                | 52.68    | 57.96    | 59.59    | 67.00    | 47.65    | 55.14    | 55.93    | 49.25    | 58.34    | 57.66    |
| mmu-miR-1951                | 114.73   | 60.91    | 66.91    | 65.41    | 97.95    | 62.69    | 53.86    | 58.64    | 59.89    | 69.42    |
| mmu-miR-1952                | 1029.14  | 860.89   | 1209.86  | 1209.86  | 1171.02  | 835.00   | 835.00   | 848.32   | 1008.92  | 821.93   |
| mmu-miR-1953                | 44.68    | 48.72    | 49.34    | 48.89    | 44.14    | 53.32    | 51.14    | 46.71    | 52.81    | 52.64    |

|                               |          |         |          |          |         |         |         |         |          |         |
|-------------------------------|----------|---------|----------|----------|---------|---------|---------|---------|----------|---------|
| mmu-miR-1954                  | 87.77    | 93.95   | 105.11   | 85.25    | 78.57   | 94.73   | 108.21  | 102.90  | 92.19    | 127.93  |
| mmu-miR-1955                  | 44.17    | 48.98   | 48.32    | 42.57    | 41.28   | 46.23   | 49.38   | 50.59   | 49.08    | 43.27   |
| mmu-miR-1956                  | 57.86    | 51.18   | 70.39    | 61.93    | 67.07   | 62.25   | 62.38   | 65.91   | 71.40    | 79.00   |
| mmu-miR-1957                  | 89.05    | 109.44  | 119.07   | 89.73    | 94.10   | 117.66  | 164.98  | 123.98  | 115.23   | 133.66  |
| mmu-miR-1958                  | 55.48    | 57.96   | 52.38    | 50.78    | 66.39   | 52.68   | 53.86   | 51.36   | 53.14    | 67.57   |
| mmu-miR-1959                  | 3561.01  | 4041.27 | 2160.02  | 3561.01  | 3644.02 | 6816.14 | 7433.09 | 4730.59 | 5786.26  | 5883.82 |
| mmu-miR-1960                  | 58.42    | 115.09  | 65.14    | 53.94    | 134.32  | 53.32   | 56.39   | 65.00   | 61.05    | 68.95   |
| mmu-miR-1961                  | 207.71   | 152.41  | 178.02   | 240.75   | 180.11  | 227.68  | 215.00  | 224.48  | 221.28   | 196.68  |
| mmu-miR-1962                  | 66.48    | 67.81   | 74.52    | 62.73    | 62.92   | 68.39   | 60.36   | 69.14   | 73.03    | 77.82   |
| mmu-miR-1963                  | 54.84    | 89.68   | 56.05    | 56.37    | 81.04   | 51.43   | 48.65   | 50.16   | 53.31    | 55.93   |
| mmu-miR-1964                  | 59.73    | 199.34  | 80.50    | 65.70    | 60.68   | 69.18   | 62.92   | 77.43   | 71.31    | 66.39   |
| mmu-miR-1965                  | 53.32    | 175.84  | 58.23    | 60.76    | 84.86   | 66.39   | 75.14   | 68.75   | 73.75    | 66.70   |
| mmu-miR-1966                  | 76.89    | 72.11   | 72.23    | 66.70    | 64.76   | 74.75   | 93.39   | 67.91   | 71.36    | 69.42   |
| mmu-miR-1967                  | 54.48    | 51.18   | 55.52    | 58.30    | 45.18   | 53.14   | 45.45   | 53.84   | 56.24    | 52.15   |
| mmu-miR-1968                  | 63.39    | 83.25   | 64.93    | 64.70    | 108.41  | 54.19   | 53.86   | 65.61   | 63.98    | 55.73   |
| mmu-miR-1969                  | 57.09    | 59.39   | 59.59    | 91.82    | 53.02   | 57.88   | 63.61   | 63.39   | 65.28    | 59.84   |
| mmu-miR-1970                  | 54.19    | 57.32   | 61.98    | 52.68    | 58.66   | 65.39   | 55.52   | 61.98   | 77.85    | 57.05   |
| mmu-miR-1971                  | 122.14   | 138.14  | 183.99   | 186.30   | 124.86  | 151.55  | 160.48  | 152.02  | 178.26   | 201.09  |
| mmu-miR-1981                  | 74.89    | 79.00   | 76.07    | 80.05    | 63.91   | 85.30   | 79.70   | 81.41   | 78.89    | 77.82   |
| mmu-miR-1982*                 | 52.86    | 45.32   | 53.57    | 55.59    | 89.34   | 55.93   | 57.36   | 53.27   | 57.33    | 62.69   |
| mmu-miR-1982.1                | 69.36    | 106.82  | 81.92    | 68.72    | 108.41  | 82.61   | 74.05   | 81.64   | 80.94    | 72.48   |
| mmu-miR-1982.1/mmu-miR-1982.2 | 91.89    | 96.32   | 101.18   | 88.73    | 71.30   | 98.73   | 115.84  | 114.66  | 117.11   | 116.05  |
| mmu-miR-1983                  | 5008.57  | 4730.59 | 6816.14  | 5008.57  | 4862.45 | 3314.75 | 3248.34 | 3950.14 | 3998.93  | 3076.86 |
| mmu-miR-199b*                 | 73.32    | 63.93   | 71.01    | 65.03    | 96.27   | 76.32   | 85.48   | 61.98   | 74.58    | 71.75   |
| mmu-miR-201/rno-miR-201       | 54.40    | 75.64   | 63.30    | 67.00    | 73.64   | 64.02   | 68.16   | 63.61   | 67.44    | 62.42   |
| mmu-miR-202-3p                | 111.86   | 100.34  | 116.73   | 107.19   | 90.66   | 116.96  | 122.02  | 113.16  | 111.03   | 117.34  |
| mmu-miR-202-5p/rno-miR-202    | 143.55   | 86.89   | 93.66    | 93.66    | 100.48  | 94.30   | 90.48   | 94.18   | 91.68    | 86.84   |
| mmu-miR-203*                  | 92.27    | 90.77   | 92.73    | 89.19    | 127.68  | 90.68   | 102.30  | 98.41   | 89.72    | 85.95   |
| mmu-miR-207/rno-miR-207       | 4139.43  | 5392.98 | 6201.14  | 4041.27  | 4588.39 | 4588.39 | 4588.39 | 5008.57 | 4074.70  | 3644.02 |
| mmu-miR-20a*/rno-miR-20a*     | 71.20    | 79.14   | 88.70    | 91.30    | 80.91   | 86.05   | 82.64   | 97.07   | 93.57    | 87.77   |
| mmu-miR-20b*/rno-miR-20b-3p   | 76.41    | 63.61   | 66.20    | 61.93    | 66.16   | 71.16   | 78.84   | 61.98   | 71.76    | 74.82   |
| mmu-miR-21*/rno-miR-21*       | 147.30   | 155.48  | 184.98   | 199.34   | 175.84  | 187.09  | 181.71  | 172.11  | 178.22   | 195.82  |
| mmu-miR-211/rno-miR-211       | 102.39   | 121.11  | 104.89   | 109.98   | 103.99  | 121.11  | 107.28  | 107.61  | 105.93   | 95.98   |
| mmu-miR-2132                  | 10657.40 | 8544.39 | 13807.10 | 10161.20 | 9665.20 | 8544.39 | 7038.25 | 6816.14 | 10409.30 | 9665.20 |
| mmu-miR-2133                  | 696.48   | 534.50  | 959.39   | 757.80   | 583.00  | 614.21  | 652.89  | 454.99  | 784.19   | 867.57  |
| mmu-miR-2134                  | 2195.20  | 1979.40 | 3950.14  | 2608.39  | 2526.77 | 2025.80 | 2561.00 | 1455.73 | 2816.13  | 4862.45 |
| mmu-miR-2135                  | 334.44   | 289.41  | 424.98   | 364.39   | 284.14  | 259.21  | 278.25  | 138.14  | 305.85   | 485.05  |
| mmu-miR-2136                  | 90.68    | 92.36   | 82.75    | 116.21   | 81.98   | 74.48   | 71.86   | 93.07   | 78.54    | 110.09  |
| mmu-miR-2137                  | 1112.34  | 1139.50 | 1455.73  | 1287.55  | 1704.30 | 1391.73 | 1391.73 | 1101.27 | 1446.86  | 2102.59 |
| mmu-miR-2138                  | 3950.14  | 3644.02 | 4381.20  | 3644.02  | 5008.57 | 3076.86 | 2648.45 | 1727.89 | 3082.79  | 5712.52 |
| mmu-miR-2139                  | 71.70    | 90.98   | 73.14    | 82.61    | 60.39   | 63.61   | 69.98   | 77.07   | 65.22    | 72.70   |
| mmu-miR-2140                  | 109.64   | 88.64   | 177.32   | 100.14   | 92.36   | 106.73  | 107.77  | 78.14   | 118.36   | 141.32  |
| mmu-miR-2141                  | 2045.11  | 1727.89 | 5008.57  | 2230.66  | 1979.40 | 1979.40 | 2126.86 | 1012.68 | 2482.11  | 3135.41 |

|                                              |          |          |          |          |          |          |          |          |          |          |
|----------------------------------------------|----------|----------|----------|----------|----------|----------|----------|----------|----------|----------|
| mmu-miR-2142                                 | 35728.90 | 39259.30 | 49553.70 | 49553.70 | 44210.70 | 42426.20 | 44210.70 | 39259.30 | 41735.00 | 39259.30 |
| mmu-miR-2143                                 | 1823.75  | 1335.39  | 3016.45  | 2782.70  | 2729.68  | 2195.20  | 2305.36  | 1588.18  | 2504.08  | 2850.82  |
| mmu-miR-2144                                 | 297.86   | 349.59   | 554.64   | 370.24   | 352.66   | 358.05   | 327.57   | 242.91   | 367.64   | 466.30   |
| mmu-miR-2145                                 | 3016.45  | 4862.45  | 3135.41  | 3401.59  | 4243.93  | 6349.55  | 6816.14  | 4588.39  | 4812.55  | 5008.57  |
| mmu-miR-2146                                 | 3314.75  | 2648.45  | 8066.27  | 3950.14  | 4041.27  | 3401.59  | 3135.41  | 2045.11  | 4326.30  | 5209.24  |
| mmu-miR-215/rno-miR-215                      | 92.95    | 75.64    | 92.73    | 123.05   | 90.09    | 64.02    | 64.30    | 80.82    | 81.40    | 109.55   |
| mmu-miR-218-1*                               | 58.86    | 56.48    | 62.97    | 61.68    | 52.75    | 60.70    | 60.61    | 62.73    | 62.50    | 49.75    |
| mmu-miR-2182                                 | 76.89    | 95.04    | 102.39   | 85.91    | 75.04    | 89.68    | 124.52   | 107.84   | 93.67    | 96.86    |
| mmu-miR-2183                                 | 353.69   | 374.97   | 287.11   | 268.46   | 267.21   | 299.09   | 260.66   | 339.32   | 282.18   | 366.25   |
| mmu-miR-220                                  | 26.12    | 26.68    | 32.08    | 48.32    | 33.83    | 38.39    | 21.98    | 24.27    | 40.11    | 25.11    |
| mmu-miR-28*                                  | 201.09   | 146.55   | 145.55   | 182.86   | 238.74   | 149.93   | 151.18   | 164.23   | 164.02   | 136.16   |
| mmu-miR-290-3p                               | 204.23   | 205.05   | 257.59   | 215.00   | 189.30   | 203.00   | 195.16   | 168.59   | 203.86   | 236.71   |
| mmu-miR-290-5p/rno-miR-290                   | 1139.50  | 1352.41  | 1236.68  | 1042.93  | 1209.86  | 1074.18  | 1149.77  | 969.02   | 904.31   | 1074.18  |
| mmu-miR-291a-3p/rno-miR-291a-3p              | 97.61    | 112.46   | 100.91   | 90.52    | 84.36    | 96.32    | 85.05    | 95.23    | 89.34    | 91.75    |
| mmu-miR-291a-5p/rno-miR-291a-5p              | 86.55    | 79.64    | 122.59   | 99.11    | 72.98    | 87.77    | 115.84   | 88.73    | 117.47   | 130.11   |
| mmu-miR-291b-3p                              | 63.23    | 66.16    | 72.85    | 63.93    | 84.22    | 75.20    | 81.55    | 69.82    | 79.09    | 62.42    |
| mmu-miR-291b-5p                              | 83.66    | 83.70    | 72.85    | 87.43    | 94.82    | 91.23    | 68.48    | 82.98    | 84.40    | 94.82    |
| mmu-miR-292-3p/rno-miR-292-3p                | 70.23    | 66.16    | 70.68    | 65.41    | 58.34    | 72.48    | 81.14    | 71.70    | 79.65    | 63.64    |
| mmu-miR-292-5p/rno-miR-292-5p                | 127.02   | 112.46   | 120.34   | 119.48   | 160.48   | 135.36   | 126.68   | 103.32   | 130.06   | 107.46   |
| mmu-miR-293                                  | 96.59    | 95.23    | 94.55    | 131.32   | 74.61    | 92.77    | 91.25    | 77.43    | 97.97    | 87.21    |
| mmu-miR-293*                                 | 51.43    | 54.64    | 56.80    | 52.86    | 48.77    | 52.89    | 50.84    | 58.30    | 55.94    | 54.17    |
| mmu-miR-294                                  | 124.21   | 132.61   | 129.43   | 134.08   | 68.20    | 133.49   | 126.05   | 111.61   | 143.30   | 116.31   |
| mmu-miR-294*/rno-miR-294                     | 157.48   | 153.64   | 210.80   | 210.80   | 150.91   | 168.86   | 188.21   | 164.23   | 189.83   | 201.75   |
| mmu-miR-295                                  | 57.09    | 68.16    | 63.93    | 62.73    | 71.57    | 61.36    | 60.78    | 74.83    | 60.40    | 58.98    |
| mmu-miR-295*/rno-miR-295                     | 76.32    | 84.34    | 86.30    | 70.86    | 171.68   | 81.80    | 111.86   | 83.36    | 70.72    | 91.43    |
| mmu-miR-297a*/mmu-miR-297b-3p/mmum-miR-297c* | 559.27   | 608.51   | 999.41   | 561.86   | 663.68   | 490.39   | 573.61   | 475.18   | 647.79   | 646.64   |
| mmu-miR-297b-5p                              | 83.80    | 97.47    | 96.98    | 96.89    | 82.61    | 104.39   | 84.39    | 106.14   | 112.24   | 99.27    |
| mmu-miR-297c                                 | 106.50   | 111.73   | 106.32   | 95.55    | 146.34   | 145.00   | 144.36   | 155.85   | 142.23   | 125.89   |
| mmu-miR-298/rno-miR-298                      | 136.52   | 110.52   | 114.50   | 111.27   | 211.75   | 130.46   | 130.46   | 89.73    | 115.01   | 114.93   |
| mmu-miR-299                                  | 62.11    | 62.97    | 69.82    | 47.16    | 62.25    | 48.27    | 79.50    | 73.32    | 51.63    | 83.05    |
| mmu-miR-300*/rno-miR-300-5p                  | 162.39   | 187.09   | 267.21   | 242.91   | 172.98   | 218.77   | 230.30   | 209.80   | 259.89   | 231.50   |
| mmu-miR-300/rno-miR-300-3p                   | 62.97    | 81.21    | 97.52    | 71.89    | 67.07    | 67.73    | 74.36    | 77.82    | 69.27    | 98.41    |
| mmu-miR-301b/rno-miR-301b                    | 79.64    | 74.05    | 73.50    | 79.57    | 61.12    | 86.05    | 94.41    | 91.30    | 81.97    | 75.20    |
| mmu-miR-302a*                                | 53.02    | 68.75    | 53.02    | 51.36    | 69.14    | 54.48    | 55.22    | 58.95    | 52.10    | 55.05    |
| mmu-miR-302b*                                | 126.46   | 126.05   | 108.32   | 138.47   | 99.02    | 137.77   | 127.32   | 123.05   | 116.35   | 114.30   |
| mmu-miR-302c*                                | 58.11    | 73.75    | 64.36    | 67.67    | 62.19    | 69.18    | 68.48    | 71.93    | 73.39    | 90.68    |
| mmu-miR-30b*/rno-miR-30b-3p                  | 156.29   | 148.11   | 147.05   | 190.61   | 113.83   | 156.29   | 117.52   | 164.23   | 161.91   | 138.47   |
| mmu-miR-322*/rno-miR-322*                    | 59.84    | 42.07    | 44.80    | 49.30    | 68.08    | 47.89    | 40.34    | 48.44    | 46.23    | 47.30    |
| mmu-miR-322/rno-miR-322                      | 444.09   | 283.16   | 446.80   | 482.84   | 326.24   | 543.21   | 339.32   | 696.48   | 802.01   | 293.34   |
| mmu-miR-324-3p                               | 140.16   | 174.11   | 125.75   | 129.43   | 155.85   | 133.49   | 124.52   | 146.55   | 137.30   | 113.16   |
| mmu-miR-325*/rno-miR-325-5p                  | 85.75    | 93.66    | 97.80    | 81.98    | 87.23    | 88.05    | 84.73    | 91.82    | 78.66    | 95.32    |
| mmu-miR-325/rno-miR-325-3p                   | 432.27   | 353.69   | 418.59   | 300.75   | 348.71   | 270.43   | 345.21   | 306.73   | 315.55   | 348.71   |
| mmu-miR-327                                  | 92.45    | 91.89    | 76.58    | 76.10    | 65.75    | 82.84    | 85.48    | 65.91    | 90.11    | 68.72    |



|                               |         |         |         |         |         |         |         |         |         |         |
|-------------------------------|---------|---------|---------|---------|---------|---------|---------|---------|---------|---------|
| mmu-miR-329/rno-miR-329       | 159.46  | 165.36  | 194.05  | 163.05  | 559.27  | 175.84  | 183.27  | 180.11  | 183.97  | 164.52  |
| mmu-miR-330*/rno-miR-330*     | 86.16   | 89.52   | 93.45   | 88.00   | 66.77   | 81.41   | 103.32  | 88.16   | 90.89   | 108.55  |
| mmu-miR-337-3p                | 155.01  | 144.36  | 184.98  | 167.11  | 207.05  | 161.80  | 152.41  | 170.66  | 148.80  | 145.82  |
| mmu-miR-337-5p                | 64.93   | 66.39   | 55.88   | 50.11   | 58.66   | 64.41   | 61.68   | 56.11   | 63.90   | 57.86   |
| mmu-miR-339-3p                | 70.45   | 78.52   | 78.14   | 85.66   | 67.91   | 72.48   | 76.32   | 93.27   | 73.91   | 105.71  |
| mmu-miR-341/rno-miR-341       | 87.38   | 76.39   | 90.98   | 86.45   | 78.57   | 81.80   | 82.64   | 70.30   | 82.66   | 83.05   |
| mmu-miR-343                   | 110.33  | 125.75  | 99.86   | 103.99  | 93.18   | 112.46  | 103.32  | 99.68   | 113.53  | 94.30   |
| mmu-miR-344                   | 67.25   | 68.16   | 68.08   | 141.59  | 52.34   | 67.25   | 78.59   | 62.73   | 79.62   | 58.98   |
| mmu-miR-345-3p/rno-miR-345-3p | 181.25  | 161.80  | 168.86  | 207.05  | 186.30  | 179.00  | 186.30  | 157.73  | 189.59  | 156.68  |
| mmu-miR-345-5p/rno-miR-345-5p | 225.73  | 231.50  | 188.93  | 297.86  | 176.96  | 327.57  | 274.46  | 312.27  | 314.85  | 214.21  |
| mmu-miR-346                   | 161.91  | 113.98  | 122.59  | 109.64  | 121.45  | 126.46  | 112.46  | 121.18  | 123.44  | 106.73  |
| mmu-miR-34b-5p/rno-miR-34b    | 242.91  | 393.68  | 228.39  | 269.18  | 345.21  | 302.89  | 459.96  | 331.43  | 305.40  | 351.39  |
| mmu-miR-34c*/rno-miR-34c*     | 98.00   | 106.39  | 122.59  | 114.30  | 97.68   | 127.25  | 145.23  | 118.33  | 122.98  | 137.77  |
| mmu-miR-350/rno-miR-350       | 411.64  | 351.39  | 364.39  | 459.96  | 274.46  | 398.61  | 359.36  | 466.30  | 419.97  | 316.36  |
| mmu-miR-351/rno-miR-351       | 358.05  | 344.05  | 480.25  | 454.99  | 345.21  | 306.73  | 318.83  | 279.27  | 355.79  | 327.57  |
| mmu-miR-362-3p                | 454.99  | 549.21  | 406.84  | 512.30  | 410.32  | 577.86  | 602.05  | 583.00  | 472.22  | 480.25  |
| mmu-miR-362-5p/rno-miR-362    | 69.98   | 93.66   | 100.75  | 107.46  | 84.73   | 107.02  | 126.68  | 123.50  | 102.42  | 99.57   |
| mmu-miR-374*                  | 127.32  | 111.27  | 113.30  | 130.23  | 113.98  | 145.00  | 137.55  | 128.39  | 127.80  | 109.77  |
| mmu-miR-376a*/rno-miR-376a*   | 98.66   | 76.05   | 192.77  | 65.91   | 118.49  | 58.30   | 67.57   | 60.18   | 62.69   | 67.57   |
| mmu-miR-376a/rno-miR-376a     | 54.57   | 41.07   | 45.91   | 85.42   | 40.23   | 41.80   | 48.23   | 36.04   | 51.34   | 47.93   |
| mmu-miR-376b*/rno-miR-376b-5p | 51.43   | 50.88   | 54.75   | 47.16   | 48.55   | 56.90   | 47.89   | 58.64   | 49.91   | 44.07   |
| mmu-miR-376b/rno-miR-376b-3p  | 75.95   | 86.20   | 85.05   | 70.45   | 69.50   | 75.20   | 75.95   | 76.41   | 66.69   | 81.64   |
| mmu-miR-376c*                 | 102.16  | 111.50  | 99.55   | 137.55  | 81.32   | 100.68  | 91.25   | 92.00   | 100.89  | 83.92   |
| mmu-miR-376c/rno-miR-376c     | 37.90   | 33.39   | 38.07   | 34.30   | 89.05   | 40.95   | 47.16   | 33.73   | 35.57   | 42.46   |
| mmu-miR-380-3p                | 71.70   | 62.97   | 99.86   | 72.48   | 73.36   | 75.20   | 62.92   | 63.16   | 63.64   | 60.68   |
| mmu-miR-380-5p/rno-miR-380    | 69.05   | 56.48   | 60.50   | 62.38   | 55.02   | 53.59   | 72.09   | 58.30   | 62.66   | 63.09   |
| mmu-miR-382*                  | 106.05  | 97.91   | 94.30   | 84.86   | 83.25   | 105.24  | 100.68  | 101.41  | 89.41   | 100.80  |
| mmu-miR-384-3p/rno-miR-384-3p | 51.82   | 49.55   | 47.11   | 47.59   | 50.69   | 47.65   | 51.75   | 48.12   | 63.41   | 51.75   |
| mmu-miR-384-5p/rno-miR-384-5p | 68.02   | 55.88   | 50.78   | 53.27   | 50.20   | 65.02   | 45.45   | 39.11   | 53.59   | 45.32   |
| mmu-miR-429/rno-miR-429       | 3076.86 | 3248.34 | 2526.77 | 3016.45 | 3016.45 | 2481.39 | 3016.45 | 2729.68 | 2891.93 | 2415.61 |
| mmu-miR-432                   | 50.98   | 43.55   | 46.86   | 48.89   | 43.55   | 49.25   | 52.15   | 37.90   | 45.77   | 47.69   |
| mmu-miR-433*                  | 273.86  | 274.46  | 355.93  | 274.46  | 306.73  | 233.34  | 266.09  | 257.59  | 266.83  | 300.75  |
| mmu-miR-434-3p/rno-miR-434    | 105.55  | 112.46  | 99.86   | 67.00   | 103.21  | 89.68   | 109.64  | 126.68  | 78.94   | 113.46  |
| mmu-miR-434-5p                | 85.00   | 81.62   | 68.08   | 78.59   | 64.93   | 78.91   | 92.45   | 87.23   | 90.30   | 80.39   |
| mmu-miR-449b                  | 112.73  | 100.34  | 68.39   | 83.80   | 69.36   | 93.27   | 86.84   | 83.36   | 85.44   | 80.05   |
| mmu-miR-449c                  | 69.67   | 77.50   | 74.83   | 77.17   | 67.91   | 67.73   | 64.76   | 63.61   | 73.06   | 61.77   |
| mmu-miR-450a-3p               | 103.14  | 115.92  | 103.32  | 139.25  | 96.86   | 101.02  | 90.66   | 110.93  | 101.74  | 100.02  |
| mmu-miR-450b-3p               | 165.77  | 157.48  | 161.80  | 92.59   | 106.93  | 126.05  | 139.00  | 141.93  | 102.56  | 158.50  |
| mmu-miR-450b-5p               | 137.07  | 131.46  | 117.02  | 121.45  | 120.57  | 137.07  | 120.05  | 125.58  | 136.59  | 106.32  |
| mmu-miR-452                   | 78.59   | 116.73  | 82.14   | 83.23   | 90.89   | 80.80   | 94.73   | 94.50   | 83.95   | 96.18   |
| mmu-miR-453                   | 115.21  | 105.24  | 102.98  | 87.77   | 159.46  | 116.46  | 97.47   | 98.41   | 99.27   | 1267.89 |
| mmu-miR-455                   | 1937.00 | 2415.61 | 1247.48 | 1619.86 | 1903.08 | 1637.61 | 1979.40 | 1661.50 | 1754.18 | 1727.89 |
| mmu-miR-463                   | 72.82   | 68.63   | 72.85   | 46.71   | 65.41   | 54.77   | 68.16   | 74.55   | 55.74   | 73.11   |

|                                                   |         |         |         |         |         |         |         |         |         |         |
|---------------------------------------------------|---------|---------|---------|---------|---------|---------|---------|---------|---------|---------|
| mmu-miR-463*                                      | 46.27   | 50.05   | 44.80   | 50.11   | 48.65   | 47.39   | 47.59   | 51.36   | 54.32   | 45.32   |
| mmu-miR-464                                       | 78.59   | 103.32  | 81.32   | 77.17   | 80.05   | 98.36   | 84.07   | 104.71  | 90.22   | 101.89  |
| mmu-miR-465a-3p/mmu-miR-465b-3p/mmu-miR-465c-3p   | 148.66  | 90.64   | 117.02  | 95.98   | 137.77  | 101.52  | 93.66   | 104.96  | 94.58   | 110.84  |
| mmu-miR-465a-5p                                   | 84.73   | 92.82   | 82.98   | 136.80  | 84.49   | 107.46  | 85.95   | 102.90  | 93.73   | 98.00   |
| mmu-miR-465b-5p                                   | 150.68  | 144.55  | 313.61  | 188.21  | 131.46  | 174.11  | 180.11  | 155.01  | 208.51  | 227.18  |
| mmu-miR-465c-5p                                   | 99.11   | 96.86   | 124.68  | 102.90  | 76.39   | 110.23  | 121.45  | 106.32  | 103.14  | 120.34  |
| mmu-miR-466a-3p/mmu-miR-466b-3p/mmu-miR-466c-3p/r | 216.92  | 281.75  | 209.16  | 236.71  | 207.71  | 208.34  | 254.77  | 237.89  | 253.23  | 263.11  |
| mmu-miR-466a-5p                                   | 646.64  | 722.52  | 690.09  | 490.39  | 619.75  | 639.46  | 705.86  | 526.46  | 624.68  | 757.80  |
| mmu-miR-466b-3-3p                                 | 104.43  | 141.32  | 130.23  | 143.93  | 251.77  | 134.82  | 150.68  | 155.68  | 160.91  | 146.55  |
| mmu-miR-466b-5p                                   | 414.59  | 485.05  | 424.98  | 387.91  | 480.25  | 497.07  | 440.18  | 403.75  | 472.28  | 490.39  |
| mmu-miR-466c-5p                                   | 421.68  | 408.55  | 345.21  | 323.68  | 487.52  | 440.18  | 466.30  | 250.75  | 443.10  | 487.52  |
| mmu-miR-466d-3p                                   | 387.91  | 414.59  | 521.00  | 444.09  | 424.98  | 348.71  | 421.68  | 370.24  | 477.06  | 454.99  |
| mmu-miR-466d-5p                                   | 497.07  | 1081.80 | 452.03  | 385.84  | 506.27  | 506.27  | 493.67  | 406.84  | 514.30  | 567.98  |
| mmu-miR-466e-5p                                   | 383.23  | 418.59  | 370.24  | 283.16  | 440.18  | 446.80  | 490.39  | 358.05  | 456.45  | 444.09  |
| mmu-miR-466f                                      | 106.05  | 108.59  | 98.73   | 99.68   | 82.20   | 104.39  | 94.73   | 117.34  | 102.96  | 97.52   |
| mmu-miR-466f-3p                                   | 1391.73 | 1123.04 | 2608.39 | 1314.64 | 1314.64 | 999.41  | 1112.34 | 807.98  | 1371.64 | 1704.30 |
| mmu-miR-466f-5p                                   | 129.23  | 154.48  | 150.24  | 146.55  | 158.18  | 211.75  | 191.11  | 188.21  | 212.27  | 178.02  |
| mmu-miR-466g                                      | 47.98   | 50.88   | 61.98   | 57.20   | 46.48   | 55.14   | 64.30   | 60.78   | 63.38   | 67.05   |
| mmu-miR-466h                                      | 89.34   | 78.81   | 102.39  | 88.00   | 77.25   | 93.27   | 82.64   | 88.16   | 87.25   | 80.39   |
| mmu-miR-466i                                      | 573.61  | 619.75  | 969.02  | 619.75  | 649.52  | 464.52  | 614.21  | 493.67  | 737.73  | 782.61  |
| mmu-miR-466j                                      | 97.61   | 83.92   | 82.14   | 83.80   | 93.66   | 83.50   | 82.14   | 73.95   | 74.84   | 68.72   |
| mmu-miR-466k                                      | 72.82   | 67.07   | 69.50   | 70.86   | 64.36   | 72.48   | 64.56   | 78.93   | 73.86   | 67.05   |
| mmu-miR-466l                                      | 44.43   | 36.95   | 43.59   | 36.52   | 38.87   | 32.43   | 46.86   | 36.52   | 37.88   | 41.58   |
| mmu-miR-467a                                      | 72.98   | 95.23   | 74.52   | 85.42   | 78.57   | 80.05   | 85.05   | 94.18   | 90.11   | 80.75   |
| mmu-miR-467a*/mmu-miR-467d*                       | 372.64  | 410.32  | 408.55  | 340.50  | 370.24  | 318.83  | 370.24  | 355.93  | 413.02  | 395.82  |
| mmu-miR-467b                                      | 128.39  | 179.57  | 121.18  | 177.32  | 136.80  | 163.93  | 179.00  | 172.57  | 162.88  | 167.11  |
| mmu-miR-467b*                                     | 289.41  | 295.16  | 432.27  | 287.11  | 232.36  | 271.73  | 281.05  | 297.86  | 363.80  | 348.71  |
| mmu-miR-467c                                      | 59.59   | 84.39   | 69.14   | 63.27   | 62.05   | 57.05   | 63.23   | 63.93   | 64.03   | 58.55   |
| mmu-miR-467d                                      | 59.36   | 50.05   | 51.36   | 95.55   | 46.66   | 47.89   | 45.80   | 45.73   | 56.41   | 44.07   |
| mmu-miR-467e                                      | 87.77   | 120.05  | 107.98  | 88.73   | 86.20   | 116.46  | 134.32  | 133.96  | 123.89  | 142.52  |
| mmu-miR-467e*                                     | 2126.86 | 1903.08 | 3644.02 | 1637.61 | 1787.11 | 1372.16 | 1455.73 | 1247.48 | 1973.57 | 2195.20 |
| mmu-miR-467f                                      | 821.93  | 577.86  | 1335.39 | 835.00  | 848.32  | 628.46  | 690.09  | 619.75  | 914.95  | 947.74  |
| mmu-miR-467g                                      | 1123.04 | 999.41  | 1903.08 | 1074.18 | 1101.27 | 757.80  | 821.93  | 729.46  | 1197.67 | 1352.41 |
| mmu-miR-467h                                      | 125.58  | 169.82  | 160.23  | 189.90  | 245.32  | 242.91  | 283.16  | 183.99  | 267.90  | 191.11  |
| mmu-miR-468                                       | 136.16  | 133.26  | 123.50  | 112.59  | 91.75   | 157.73  | 153.00  | 167.11  | 151.24  | 148.66  |
| mmu-miR-469                                       | 132.34  | 178.02  | 146.34  | 119.91  | 110.33  | 125.75  | 119.41  | 114.66  | 116.96  | 105.71  |
| mmu-miR-470                                       | 89.05   | 78.52   | 98.41   | 90.98   | 74.05   | 96.32   | 104.89  | 107.46  | 100.69  | 100.39  |
| mmu-miR-470*                                      | 80.08   | 46.89   | 58.60   | 58.05   | 83.05   | 56.62   | 54.40   | 54.48   | 50.35   | 57.37   |
| mmu-miR-471/rno-miR-471                           | 73.50   | 85.30   | 94.91   | 90.98   | 78.30   | 68.05   | 73.36   | 72.98   | 86.33   | 87.41   |
| mmu-miR-483                                       | 48.32   | 57.70   | 55.52   | 94.91   | 63.39   | 58.30   | 53.45   | 65.61   | 60.24   | 54.25   |
| mmu-miR-483*/rno-miR-483                          | 722.52  | 646.64  | 583.00  | 452.03  | 729.46  | 729.46  | 608.51  | 559.27  | 517.74  | 628.46  |
| mmu-miR-488*                                      | 61.95   | 82.39   | 66.20   | 59.29   | 60.39   | 64.41   | 78.84   | 73.95   | 73.07   | 77.50   |
| mmu-miR-488/rno-miR-488                           | 117.52  | 132.96  | 195.16  | 147.75  | 105.64  | 127.25  | 130.46  | 119.91  | 146.73  | 107.98  |

|                            |         |         |         |         |         |         |         |         |         |         |
|----------------------------|---------|---------|---------|---------|---------|---------|---------|---------|---------|---------|
| mmu-miR-489                | 860.89  | 769.59  | 722.52  | 316.36  | 696.48  | 406.84  | 646.64  | 602.05  | 335.05  | 696.48  |
| mmu-miR-493                | 97.34   | 100.68  | 94.55   | 91.30   | 128.86  | 118.18  | 114.73  | 129.23  | 100.03  | 117.84  |
| mmu-miR-500/rno-miR-500    | 1727.89 | 1846.86 | 1171.02 | 1661.50 | 1372.16 | 1846.86 | 1823.75 | 1979.40 | 1488.74 | 1661.50 |
| mmu-miR-501-5p/rno-miR-501 | 134.55  | 144.55  | 115.71  | 127.48  | 102.57  | 163.39  | 153.00  | 135.54  | 136.33  | 123.61  |
| mmu-miR-503*               | 526.46  | 459.96  | 497.07  | 506.27  | 418.59  | 408.55  | 427.82  | 401.07  | 478.16  | 387.91  |
| mmu-miR-503/rno-miR-503    | 296.91  | 249.27  | 284.14  | 383.23  | 406.84  | 316.36  | 317.23  | 309.66  | 363.08  | 317.23  |
| mmu-miR-505                | 41.28   | 43.92   | 41.46   | 49.77   | 39.11   | 51.07   | 54.40   | 47.69   | 46.91   | 45.86   |
| mmu-miR-509-3p             | 76.07   | 93.95   | 87.16   | 82.46   | 76.80   | 85.30   | 71.50   | 78.93   | 85.06   | 70.30   |
| mmu-miR-509-5p             | 52.15   | 53.11   | 57.26   | 57.56   | 69.67   | 48.89   | 57.87   | 57.26   | 55.41   | 52.15   |
| mmu-miR-511/rno-miR-511    | 107.11  | 84.86   | 78.57   | 77.89   | 120.05  | 73.43   | 74.05   | 81.92   | 76.40   | 66.14   |
| mmu-miR-540-3p/rno-miR-540 | 61.32   | 46.66   | 50.57   | 52.15   | 58.95   | 65.98   | 51.75   | 40.70   | 58.25   | 50.05   |
| mmu-miR-540-5p             | 78.84   | 88.91   | 97.52   | 96.59   | 88.57   | 94.50   | 86.84   | 100.86  | 97.17   | 90.68   |
| mmu-miR-541/rno-miR-541    | 83.25   | 94.50   | 97.80   | 98.30   | 95.83   | 112.46  | 98.41   | 95.90   | 104.77  | 96.86   |
| mmu-miR-544/rno-miR-544    | 59.59   | 49.55   | 54.25   | 52.15   | 65.41   | 50.30   | 50.84   | 50.80   | 51.91   | 54.25   |
| mmu-miR-546                | 63.61   | 57.20   | 59.59   | 65.91   | 60.39   | 68.39   | 76.61   | 70.30   | 79.89   | 77.02   |
| mmu-miR-547                | 85.25   | 89.73   | 79.39   | 124.39  | 69.36   | 80.39   | 74.64   | 75.08   | 82.07   | 68.72   |
| mmu-miR-582-3p             | 370.24  | 359.36  | 358.05  | 485.05  | 337.52  | 362.73  | 437.05  | 450.05  | 450.25  | 385.84  |
| mmu-miR-582-5p/rno-miR-582 | 96.39   | 82.11   | 83.57   | 142.82  | 65.41   | 122.30  | 100.34  | 154.05  | 107.91  | 86.84   |
| mmu-miR-598/rno-miR-598-3p | 191.11  | 122.82  | 113.46  | 111.27  | 331.43  | 104.39  | 104.23  | 112.59  | 113.13  | 103.99  |
| mmu-miR-599                | 38.70   | 39.11   | 41.07   | 39.36   | 74.05   | 42.82   | 33.09   | 40.70   | 38.33   | 33.73   |
| mmu-miR-654-5p             | 52.15   | 47.93   | 41.80   | 40.07   | 40.70   | 42.46   | 42.82   | 39.64   | 40.92   | 37.90   |
| mmu-miR-664/rno-miR-664    | 295.16  | 314.98  | 285.55  | 285.55  | 280.21  | 278.25  | 273.11  | 292.18  | 278.64  | 237.89  |
| mmu-miR-665/rno-miR-665    | 129.23  | 142.11  | 208.34  | 169.82  | 134.82  | 152.41  | 174.96  | 160.82  | 162.99  | 182.86  |
| mmu-miR-666-3p             | 61.77   | 66.79   | 66.91   | 66.25   | 58.95   | 57.37   | 65.45   | 63.93   | 80.30   | 57.05   |
| mmu-miR-666-5p             | 107.98  | 97.20   | 105.11  | 84.86   | 71.30   | 75.95   | 102.08  | 100.02  | 85.42   | 111.36  |
| mmu-miR-667/rno-miR-667    | 2160.02 | 2258.39 | 2481.39 | 1727.89 | 2354.34 | 1704.30 | 1937.00 | 1787.11 | 1787.38 | 2126.86 |
| mmu-miR-669a               | 188.93  | 147.30  | 121.18  | 135.96  | 99.36   | 181.25  | 150.68  | 156.29  | 159.34  | 151.55  |
| mmu-miR-669b               | 95.14   | 98.66   | 71.86   | 134.08  | 70.86   | 74.14   | 65.45   | 69.14   | 90.34   | 65.76   |
| mmu-miR-669c               | 959.39  | 985.55  | 1060.80 | 769.59  | 1042.93 | 1042.93 | 1074.18 | 860.89  | 1117.69 | 1247.48 |
| mmu-miR-669e               | 205.05  | 239.52  | 205.36  | 211.75  | 214.21  | 285.55  | 293.34  | 245.32  | 293.76  | 267.21  |
| mmu-miR-669f               | 1661.50 | 1588.18 | 2850.82 | 1455.73 | 1661.50 | 1171.02 | 1314.64 | 1139.50 | 1591.81 | 1979.40 |
| mmu-miR-669g               | 58.23   | 54.86   | 62.25   | 60.18   | 105.24  | 54.48   | 56.39   | 56.73   | 56.81   | 72.59   |
| mmu-miR-669h-3p            | 70.23   | 74.55   | 94.30   | 151.55  | 66.91   | 67.00   | 76.32   | 82.20   | 105.23  | 96.59   |
| mmu-miR-669h-5p            | 64.36   | 56.16   | 57.05   | 61.59   | 59.59   | 61.86   | 66.39   | 53.84   | 60.77   | 63.64   |
| mmu-miR-669i               | 93.95   | 103.14  | 134.55  | 110.52  | 87.50   | 123.82  | 108.59  | 113.75  | 143.57  | 118.64  |
| mmu-miR-669j               | 36.43   | 41.58   | 39.98   | 32.08   | 43.39   | 39.98   | 38.87   | 40.23   | 44.75   | 46.66   |
| mmu-miR-669k               | 43.05   | 37.32   | 39.98   | 47.73   | 41.88   | 38.39   | 42.46   | 42.57   | 46.84   | 43.00   |
| mmu-miR-669l               | 398.61  | 452.03  | 411.64  | 339.32  | 543.21  | 427.82  | 390.66  | 390.66  | 453.69  | 501.27  |
| mmu-miR-669m               | 512.30  | 512.30  | 631.73  | 401.07  | 452.03  | 364.39  | 340.50  | 452.03  | 475.72  | 587.52  |
| mmu-miR-669n               | 549.21  | 675.42  | 559.27  | 471.29  | 587.52  | 675.42  | 696.48  | 561.86  | 632.86  | 744.48  |
| mmu-miR-669o               | 437.05  | 475.18  | 390.66  | 377.14  | 450.05  | 487.52  | 497.07  | 437.05  | 509.01  | 534.50  |
| mmu-miR-670                | 75.20   | 83.70   | 87.16   | 85.14   | 79.26   | 97.91   | 102.80  | 87.23   | 82.40   | 82.84   |
| mmu-miR-672/rno-miR-672    | 323.68  | 268.46  | 266.09  | 351.39  | 235.10  | 346.71  | 261.98  | 318.83  | 321.53  | 210.80  |

|                             |         |          |         |         |          |          |          |          |          |          |
|-----------------------------|---------|----------|---------|---------|----------|----------|----------|----------|----------|----------|
| mmu-miR-673-3p              | 82.14   | 88.64    | 85.91   | 80.75   | 127.25   | 93.89    | 84.39    | 94.50    | 84.43    | 80.91    |
| mmu-miR-673-5p              | 84.36   | 85.57    | 76.07   | 125.75  | 76.61    | 76.84    | 81.55    | 80.08    | 86.30    | 75.39    |
| mmu-miR-674*/rno-miR-674-3p | 255.50  | 220.05   | 181.71  | 254.77  | 161.25   | 263.11   | 236.71   | 273.86   | 263.33   | 211.75   |
| mmu-miR-675-3p              | 85.00   | 74.55    | 70.68   | 68.72   | 71.16    | 75.20    | 77.82    | 66.45    | 123.06   | 65.76    |
| mmu-miR-675-5p/rno-miR-675  | 273.11  | 246.25   | 317.23  | 281.05  | 260.66   | 289.41   | 322.21   | 196.68   | 275.06   | 323.68   |
| mmu-miR-676                 | 124.21  | 171.11   | 118.33  | 134.08  | 129.59   | 138.14   | 183.27   | 139.77   | 138.50   | 147.75   |
| mmu-miR-676*                | 73.86   | 85.57    | 91.25   | 92.95   | 75.56    | 88.64    | 93.39    | 93.80    | 97.24    | 84.68    |
| mmu-miR-677                 | 314.98  | 310.66   | 209.80  | 346.71  | 403.75   | 450.05   | 497.07   | 516.84   | 472.50   | 312.27   |
| mmu-miR-678                 | 77.43   | 82.75    | 72.23   | 75.14   | 201.75   | 59.99    | 69.18    | 73.64    | 73.14    | 72.70    |
| mmu-miR-679                 | 107.77  | 118.49   | 107.34  | 97.80   | 117.66   | 101.52   | 101.36   | 91.02    | 115.58   | 87.41    |
| mmu-miR-680                 | 55.48   | 53.88    | 55.22   | 52.38   | 47.98    | 48.65    | 54.77    | 58.30    | 50.66    | 48.93    |
| mmu-miR-681                 | 77.82   | 94.30    | 81.68   | 81.41   | 70.45    | 74.14    | 80.82    | 72.70    | 77.75    | 79.70    |
| mmu-miR-682                 | 45.98   | 47.30    | 47.11   | 54.25   | 51.25    | 48.89    | 51.75    | 48.12    | 49.56    | 44.37    |
| mmu-miR-683                 | 93.27   | 108.11   | 101.18  | 101.18  | 107.61   | 112.46   | 102.08   | 119.41   | 111.06   | 102.90   |
| mmu-miR-684                 | 86.30   | 99.86    | 74.83   | 84.68   | 83.05    | 77.50    | 72.09    | 84.86    | 88.81    | 76.32    |
| mmu-miR-685/rno-miR-685     | 177.32  | 149.30   | 198.82  | 248.18  | 176.96   | 202.48   | 188.93   | 176.46   | 232.15   | 183.99   |
| mmu-miR-686                 | 127.02  | 406.84   | 121.18  | 102.30  | 128.21   | 119.41   | 130.84   | 128.21   | 120.26   | 132.23   |
| mmu-miR-687                 | 84.07   | 93.66    | 125.75  | 84.68   | 68.95    | 90.68    | 88.64    | 90.34    | 83.26    | 86.84    |
| mmu-miR-688                 | 82.39   | 82.39    | 99.86   | 81.98   | 89.56    | 96.32    | 96.07    | 88.16    | 84.26    | 94.82    |
| mmu-miR-689                 | 167.68  | 130.11   | 114.17  | 114.50  | 174.11   | 127.25   | 125.75   | 113.16   | 114.56   | 132.96   |
| mmu-miR-690                 | 9665.20 | 10161.20 | 7038.25 | 9665.20 | 8066.27  | 8066.27  | 9665.20  | 8809.30  | 10161.30 | 11197.80 |
| mmu-miR-691                 | 355.93  | 663.68   | 459.96  | 899.99  | 821.93   | 860.89   | 1477.89  | 1823.75  | 1048.94  | 876.75   |
| mmu-miR-692                 | 84.36   | 80.24    | 68.72   | 59.59   | 98.36    | 71.50    | 69.18    | 71.16    | 73.26    | 66.70    |
| mmu-miR-693-3p              | 101.98  | 112.91   | 86.30   | 94.68   | 170.23   | 87.38    | 90.09    | 90.48    | 88.22    | 84.68    |
| mmu-miR-693-5p              | 150.24  | 139.55   | 169.20  | 146.07  | 126.18   | 124.52   | 149.30   | 140.53   | 146.31   | 143.30   |
| mmu-miR-694                 | 91.43   | 85.93    | 98.73   | 95.98   | 91.30    | 99.86    | 101.36   | 107.19   | 98.45    | 86.84    |
| mmu-miR-695                 | 121.55  | 99.27    | 137.32  | 113.05  | 112.73   | 111.36   | 125.32   | 118.64   | 113.85   | 134.82   |
| mmu-miR-696                 | 81.88   | 63.93    | 61.41   | 77.17   | 64.23    | 80.05    | 76.61    | 64.70    | 68.63    | 57.66    |
| mmu-miR-697                 | 100.39  | 71.89    | 76.39   | 67.39   | 182.16   | 68.77    | 71.16    | 65.32    | 65.20    | 67.57    |
| mmu-miR-698                 | 77.82   | 87.21    | 95.23   | 77.55   | 88.27    | 108.86   | 90.89    | 124.39   | 102.88   | 82.11    |
| mmu-miR-700                 | 101.61  | 101.89   | 106.32  | 113.05  | 118.92   | 105.64   | 96.07    | 120.23   | 112.19   | 107.61   |
| mmu-miR-701                 | 61.95   | 87.62    | 67.67   | 76.10   | 122.14   | 67.41    | 67.39    | 69.14    | 66.41    | 64.00    |
| mmu-miR-702                 | 82.61   | 105.24   | 94.55   | 112.12  | 87.21    | 103.88   | 99.80    | 101.26   | 111.05   | 89.56    |
| mmu-miR-703                 | 34.02   | 32.08    | 41.46   | 74.82   | 32.89    | 33.73    | 35.82    | 33.73    | 40.35    | 33.73    |
| mmu-miR-704                 | 50.48   | 50.25    | 51.61   | 53.64   | 51.73    | 61.86    | 58.98    | 55.45    | 55.60    | 55.45    |
| mmu-miR-705                 | 103.14  | 108.11   | 129.02  | 116.96  | 77.14    | 114.30   | 73.36    | 103.32   | 102.07   | 114.93   |
| mmu-miR-706                 | 261.98  | 209.16   | 543.21  | 358.05  | 218.77   | 225.73   | 253.08   | 180.46   | 343.30   | 374.97   |
| mmu-miR-707                 | 96.27   | 91.89    | 82.98   | 77.17   | 74.36    | 78.18    | 77.57    | 82.98    | 88.49    | 83.92    |
| mmu-miR-709                 | 7863.34 | 15282.20 | 7863.34 | 7863.34 | 11197.80 | 12269.60 | 21159.30 | 12269.60 | 10689.00 | 13196.00 |
| mmu-miR-710                 | 111.50  | 101.36   | 158.50  | 152.02  | 101.98   | 123.82   | 135.05   | 105.29   | 141.70   | 155.01   |
| mmu-miR-711                 | 263.11  | 268.46   | 348.71  | 283.16  | 323.68   | 273.11   | 304.68   | 225.73   | 285.23   | 302.89   |
| mmu-miR-712                 | 151.80  | 135.54   | 143.30  | 130.64  | 106.61   | 123.61   | 131.46   | 134.82   | 117.22   | 128.86   |
| mmu-miR-712*                | 178.02  | 194.05   | 182.86  | 178.02  | 165.36   | 197.39   | 181.71   | 190.61   | 204.25   | 158.18   |

|                             |         |         |         |         |         |         |         |         |         |         |
|-----------------------------|---------|---------|---------|---------|---------|---------|---------|---------|---------|---------|
| mmu-miR-713                 | 110.84  | 124.86  | 137.32  | 97.80   | 109.21  | 106.32  | 110.52  | 149.71  | 103.53  | 140.77  |
| mmu-miR-714                 | 85.57   | 109.07  | 112.18  | 105.43  | 105.24  | 97.52   | 93.07   | 91.30   | 104.07  | 122.77  |
| mmu-miR-715                 | 155.48  | 189.90  | 170.23  | 173.25  | 151.80  | 190.61  | 181.71  | 174.11  | 193.68  | 157.73  |
| mmu-miR-717                 | 59.84   | 58.64   | 58.23   | 58.95   | 59.59   | 63.20   | 62.25   | 57.70   | 60.13   | 57.05   |
| mmu-miR-718                 | 78.30   | 95.48   | 82.39   | 81.68   | 75.80   | 82.46   | 75.95   | 87.23   | 88.51   | 81.88   |
| mmu-miR-719                 | 53.64   | 50.69   | 74.52   | 48.32   | 51.05   | 60.36   | 82.64   | 61.68   | 68.17   | 89.34   |
| mmu-miR-721                 | 77.82   | 82.11   | 98.73   | 81.68   | 83.89   | 84.07   | 91.75   | 101.41  | 100.10  | 108.21  |
| mmu-miR-741                 | 134.55  | 99.11   | 96.39   | 91.30   | 231.50  | 96.32   | 96.89   | 98.73   | 95.76   | 94.30   |
| mmu-miR-742                 | 73.32   | 68.87   | 71.50   | 71.75   | 68.08   | 82.11   | 88.64   | 64.36   | 71.02   | 80.05   |
| mmu-miR-742*                | 57.86   | 59.59   | 61.12   | 59.29   | 53.27   | 57.88   | 67.57   | 59.31   | 61.22   | 65.32   |
| mmu-miR-743a                | 128.21  | 133.66  | 128.21  | 62.38   | 111.50  | 93.89   | 105.98  | 154.05  | 88.50   | 139.25  |
| mmu-miR-743b-3p             | 41.64   | 43.00   | 39.98   | 68.39   | 37.32   | 51.43   | 40.34   | 49.57   | 49.20   | 45.86   |
| mmu-miR-743b-5p             | 29.55   | 27.41   | 34.30   | 26.68   | 29.00   | 26.68   | 26.68   | 41.58   | 32.76   | 73.52   |
| mmu-miR-762                 | 268.46  | 245.32  | 304.68  | 281.75  | 316.36  | 226.25  | 284.14  | 191.68  | 248.98  | 278.25  |
| mmu-miR-763                 | 84.73   | 84.39   | 85.42   | 75.89   | 72.41   | 85.30   | 83.66   | 82.61   | 77.47   | 111.73  |
| mmu-miR-764-3p              | 58.30   | 48.32   | 53.94   | 56.37   | 81.32   | 64.73   | 45.45   | 46.17   | 50.10   | 39.98   |
| mmu-miR-764-5p/rno-miR-764  | 111.50  | 104.04  | 108.86  | 108.41  | 98.48   | 113.05  | 129.43  | 108.68  | 110.28  | 91.25   |
| mmu-miR-767                 | 1209.86 | 1247.48 | 1558.32 | 1391.73 | 1414.43 | 1149.77 | 1042.93 | 1209.86 | 1226.27 | 1171.02 |
| mmu-miR-770-3p              | 113.16  | 104.55  | 199.34  | 153.00  | 109.44  | 113.46  | 123.05  | 109.21  | 141.52  | 176.96  |
| mmu-miR-770-5p/rno-miR-770  | 101.26  | 92.73   | 87.79   | 99.48   | 83.57   | 107.02  | 109.27  | 109.98  | 100.28  | 95.80   |
| mmu-miR-7b/rno-miR-7b       | 87.38   | 88.73   | 90.09   | 101.52  | 91.93   | 96.32   | 99.09   | 87.77   | 99.92   | 95.32   |
| mmu-miR-804                 | 172.11  | 168.59  | 153.64  | 160.82  | 165.77  | 147.30  | 167.11  | 165.77  | 162.08  | 160.82  |
| mmu-miR-805                 | 359.36  | 331.43  | 253.08  | 466.30  | 271.73  | 608.51  | 464.52  | 573.61  | 574.04  | 331.43  |
| mmu-miR-871                 | 150.91  | 69.23   | 72.85   | 67.00   | 79.57   | 70.00   | 65.91   | 64.70   | 68.33   | 74.14   |
| mmu-miR-872*/rno-miR-872*   | 1171.02 | 1372.16 | 1314.64 | 1060.80 | 1112.34 | 947.74  | 985.55  | 899.99  | 944.97  | 985.55  |
| mmu-miR-875-3p              | 2938.41 | 3076.86 | 1979.40 | 2258.39 | 2938.41 | 3135.41 | 3401.59 | 2850.82 | 2963.84 | 2561.00 |
| mmu-miR-876-3p              | 73.86   | 66.66   | 55.00   | 59.95   | 45.91   | 66.66   | 60.16   | 46.48   | 64.30   | 57.86   |
| mmu-miR-876-5p/rno-miR-876  | 21.98   | 14.05   | 24.27   | 25.11   | 26.12   | 21.98   | 27.41   | 24.27   | 24.05   | 21.98   |
| mmu-miR-878-3p              | 848.32  | 681.37  | 614.21  | 192.77  | 608.51  | 395.82  | 526.46  | 480.25  | 274.20  | 594.68  |
| mmu-miR-878-5p              | 48.65   | 47.93   | 50.16   | 47.73   | 45.91   | 42.14   | 48.65   | 49.57   | 48.85   | 48.39   |
| mmu-miR-879*                | 43.05   | 44.43   | 39.98   | 39.64   | 49.55   | 49.25   | 36.66   | 55.45   | 38.71   | 46.89   |
| mmu-miR-879/rno-miR-879     | 34.02   | 36.95   | 34.30   | 39.36   | 100.91  | 37.32   | 38.70   | 43.39   | 39.36   | 30.60   |
| mmu-miR-880                 | 80.87   | 82.75   | 90.68   | 91.30   | 76.98   | 89.27   | 89.09   | 80.43   | 91.84   | 87.41   |
| mmu-miR-881                 | 89.73   | 93.07   | 99.09   | 84.86   | 72.75   | 93.27   | 83.07   | 101.98  | 101.95  | 96.05   |
| mmu-miR-881*                | 105.55  | 121.75  | 135.05  | 120.57  | 99.27   | 147.30  | 135.96  | 156.68  | 158.20  | 145.82  |
| mmu-miR-882                 | 168.59  | 175.27  | 210.80  | 180.11  | 166.62  | 210.80  | 199.34  | 199.34  | 202.93  | 235.91  |
| mmu-miR-883a-3p             | 61.77   | 63.27   | 69.50   | 63.93   | 63.27   | 65.39   | 69.57   | 60.41   | 65.01   | 61.20   |
| mmu-miR-883a-5p             | 340.50  | 378.89  | 410.32  | 326.24  | 372.64  | 359.36  | 411.64  | 383.23  | 385.57  | 459.96  |
| mmu-miR-883b-3p/rno-miR-883 | 43.05   | 42.25   | 48.89   | 44.37   | 41.64   | 40.95   | 48.23   | 48.77   | 49.04   | 52.89   |
| mmu-miR-883b-5p             | 92.73   | 91.23   | 107.34  | 90.34   | 90.66   | 100.68  | 109.27  | 113.39  | 103.98  | 133.49  |
| mmu-miR-92a*                | 65.91   | 60.68   | 82.14   | 57.20   | 60.39   | 62.69   | 63.23   | 57.00   | 60.77   | 99.48   |
| mmu-miR-92a/rno-miR-92a     | 149.71  | 143.93  | 146.07  | 148.66  | 122.30  | 172.98  | 163.39  | 178.02  | 154.03  | 151.80  |
| RNU1-1                      | 2526.77 | 2526.77 | 2415.61 | 3248.34 | 2230.66 | 3561.01 | 3561.01 | 3561.01 | 3644.81 | 2938.41 |

|                |          |          |          |          |          |          |          |          |          |          |
|----------------|----------|----------|----------|----------|----------|----------|----------|----------|----------|----------|
| RNU5G          | 1846.86  | 2102.59  | 4243.93  | 2481.39  | 1937.00  | 3248.34  | 3644.02  | 2938.41  | 3461.07  | 4041.27  |
| RNU6-1         | 999.41   | 915.50   | 3314.75  | 2126.86  | 1637.61  | 1455.73  | 1637.61  | 1335.39  | 2342.89  | 2230.66  |
| RNU6-1         | 10161.20 | 10657.40 | 14644.90 | 13807.10 | 12269.60 | 13196.00 | 13196.00 | 11197.80 | 14239.10 | 15282.20 |
| SNORA66        | 62.25    | 86.89    | 74.52    | 105.98   | 68.95    | 76.58    | 69.57    | 61.32    | 77.27    | 66.39    |
| SNORD10        | 57.37    | 59.59    | 58.60    | 57.56    | 54.75    | 63.61    | 60.36    | 61.32    | 59.92    | 54.75    |
| SNORD110       | 80.50    | 85.30    | 80.80    | 93.66    | 62.73    | 99.11    | 96.89    | 119.41   | 100.50   | 108.21   |
| SNORD118       | 45.55    | 50.05    | 47.50    | 53.27    | 47.98    | 41.58    | 49.30    | 44.07    | 44.28    | 47.30    |
| SNORD12        | 116.58   | 140.53   | 150.24   | 181.25   | 145.23   | 180.11   | 161.91   | 190.61   | 185.05   | 134.32   |
| SNORD13        | 257.59   | 345.21   | 222.07   | 393.68   | 378.89   | 646.64   | 631.73   | 696.48   | 556.25   | 411.64   |
| SNORD14B       | 120.34   | 117.18   | 143.30   | 117.52   | 217.89   | 121.11   | 123.05   | 123.50   | 130.74   | 117.66   |
| SNORD15A       | 54.48    | 54.47    | 53.94    | 57.86    | 53.27    | 52.89    | 54.40    | 51.36    | 47.93    | 44.68    |
| SNORD2         | 4041.27  | 3749.25  | 2230.66  | 3314.75  | 3401.59  | 3866.43  | 3866.43  | 3644.02  | 3655.13  | 3314.75  |
| SNORD3@        | 266.09   | 279.27   | 377.14   | 310.66   | 281.05   | 368.68   | 454.99   | 345.21   | 369.60   | 464.52   |
| SNORD38B       | 675.42   | 796.48   | 478.15   | 848.32   | 876.75   | 1247.48  | 1123.04  | 1236.68  | 1125.52  | 722.52   |
| SNORD44        | 63.91    | 73.36    | 62.25    | 87.16    | 58.34    | 64.02    | 70.32    | 69.42    | 66.41    | 73.52    |
| SNORD48        | 112.73   | 111.27   | 119.41   | 123.50   | 92.91    | 135.96   | 108.93   | 131.92   | 127.61   | 116.96   |
| SNORD49A       | 47.36    | 63.61    | 50.98    | 57.20    | 59.59    | 49.57    | 61.36    | 46.71    | 51.50    | 48.39    |
| SNORD4A        | 64.93    | 64.23    | 57.26    | 50.98    | 53.27    | 54.19    | 53.02    | 53.57    | 50.66    | 59.59    |
| SNORD6         | 97.07    | 93.66    | 89.80    | 71.25    | 71.57    | 105.24   | 92.82    | 106.61   | 88.88    | 115.71   |
| SNORD65        | 21159.30 | 24397.10 | 21159.30 | 21159.30 | 23594.80 | 19679.00 | 23594.80 | 19679.00 | 20888.30 | 21159.30 |
| SNORD68        | 302.89   | 256.77   | 245.32   | 631.73   | 385.84   | 403.75   | 393.68   | 432.27   | 553.45   | 393.68   |
| sv40-miR-S1-3p | 54.84    | 52.09    | 50.57    | 88.34    | 51.05    | 55.93    | 53.86    | 52.89    | 57.45    | 47.69    |
| sv40-miR-S1-5p | 326.24   | 291.43   | 332.64   | 306.73   | 424.98   | 256.77   | 268.46   | 234.48   | 253.86   | 268.46   |

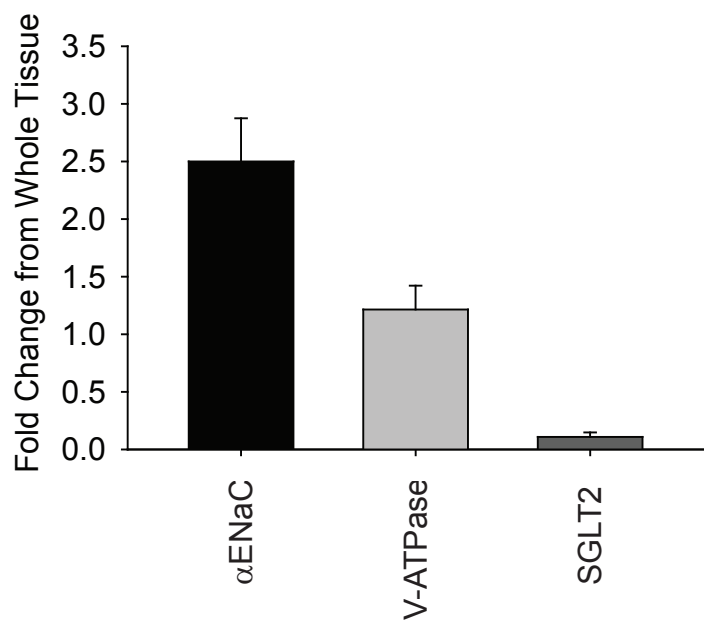

A

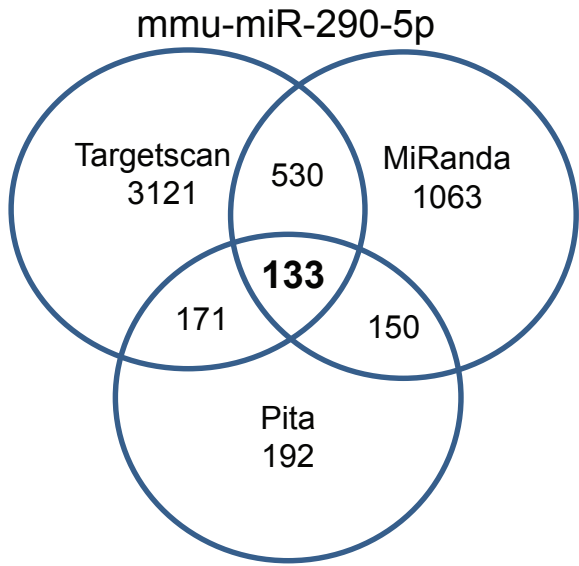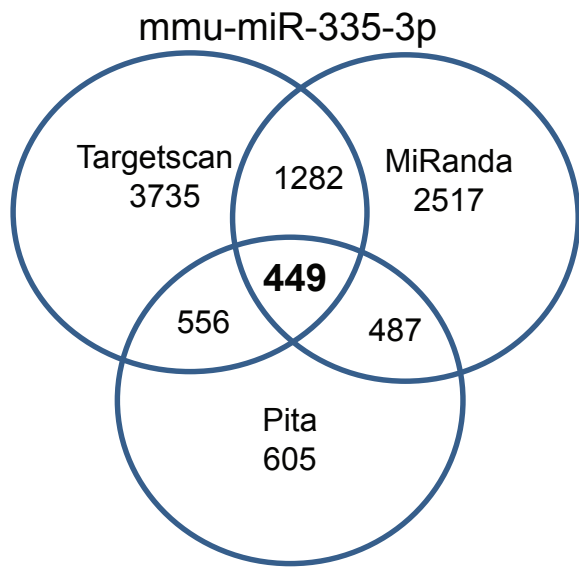



**B**

| Gene Name                    | No Steroids                                                                         | 100 $\mu$ M Aldosterone                                                             | Fold Change<br>(n=3) | ComiR Score |
|------------------------------|-------------------------------------------------------------------------------------|-------------------------------------------------------------------------------------|----------------------|-------------|
| Ccdc88a                      | 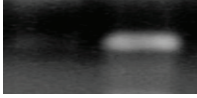   |    | 16.0                 | 0.9999      |
| Arrdc3                       |    |    | 1.5                  | 0.9999      |
| Scml2                        |    |    | 2.4                  | 0.9999      |
| Sox2                         |   |  | 2.6                  | 0.9932      |
| Sgk1<br>(+ve cont)           |  |  | 5.0                  | 0.4121      |
| Actb<br>(loading<br>control) |  |  | 1.1                  | 0.1791      |

Supplemental Table 1: Nucleotide sequences for siRNA, miRNA and mRNA targets. These were used for protein knockdown or qRT-PCR amplification protocols as described in the Methods and Results sections.

| Application                             | Target                        | Sequence                 |
|-----------------------------------------|-------------------------------|--------------------------|
| siRNA<br>(smartpool)                    | Dicer1                        | ACAGGAAUCAGGAUAAUUA      |
|                                         |                               | GCAAUUUGGUGGUUCGUUU      |
|                                         |                               | GGAAAUACCUGUACAACCA      |
|                                         |                               | GGUAGACUGUGGACCGUUU      |
|                                         | Ank3                          | GGACUACGGCUGACGGCAA      |
|                                         |                               | CCUUGUGAGCGGACGGAUA      |
|                                         |                               | CCUCAUACCUACACGGGAGA     |
|                                         |                               | GGCUAUAAGGUGAAGACGA      |
| miRNA<br>(LNA)                          | mmu-miR-1983                  | CUCACCUGGAGCAUGUUUUCU    |
|                                         | mmu-miR-290-5p                | ACUCAAAUAUGGGGGCACUUU    |
|                                         | mmu-miR-335-3p                | UUUUUCAUUUUGCUCCUGACC    |
| qRT-PCR<br>miR forward primer (5'-3')   | mmu-miR-1983                  | CTCACCTGGAGCATGTTTTCT    |
|                                         | mmu-miR-290-5p                | ACTCAAATATGGGGGCACTT     |
|                                         | mmu-miR-335-3p                | TTTTTCATTATTGCTCCTGACC   |
|                                         | mmu-miR-10a                   | TACCCTGTAGATCCGAATTTGTG  |
|                                         | mmu-miR-19a                   | TGTGCAAATCTATGCAAACTGA   |
| RT-PCR<br>mRNA (forward/reverse, 5'-3') | Actin                         | GCAGCTCCTTCGTTGCCGGT     |
|                                         |                               | GGGGCCACACGCAGCTCATT     |
|                                         | aENaC                         | GCTCAACCTTGACCTAGACCT    |
|                                         |                               | GGTGGAACCTCGATCAGTGCC    |
|                                         | SGK1                          | CTGCTCGAAGCACCTTACC      |
|                                         |                               | TCCTGAGGATGGGACATTTTCA   |
|                                         | SGLT2                         | TCTGGTTATCGCTGCCTATTTT   |
|                                         |                               | AGCCCTCCTGTCACAGTATAA    |
|                                         | V-ATPase                      | ACATGTCCACTGGAAGCCAGTAA  |
|                                         |                               | ATGAACGTATGAGGCCAGTGAGCA |
|                                         | Arrdc3                        | CAGAGGTTGTAACGGAGGAAC    |
|                                         |                               | GGGGCAGGAACCGAAACTC      |
|                                         | Ccdc88a                       | AGTGGTAGCTTCAGAGTACAAGA  |
|                                         |                               | TCTAGTTGCTGATACTGCTCCTT  |
|                                         | Scml2                         | AGGCCCCAGAAGCTGCAGAA     |
|                                         |                               | TGTGGTGAAGTGTGTTTGCCTTG  |
|                                         | Sox2                          | GCGGAGTGGAAACTTTTGCC     |
| CGGGAAGCGTACTTATCCTT                    |                               |                          |
| qPCR protocol                           | 50°C- 2min                    |                          |
|                                         | 95°C -2min                    |                          |
|                                         | 35 cycles 95°C 15s, 60°C 1min |                          |
